# Supplementary material for: Shedding Some Light over the Floral Metabolism by Arum Lily (Zantedeschia aethiopica) Spathe De Novo Transcriptome Assembly
Source: PubMed Central journal article supplement (PMC3948674; doi:10.1371/journal.pone.0090487), 2014-03-10
Supplement: pone.0090487.s018.pdf [file pone.0090487.s018.pdf]

Table S1: Cysteine-rich antimicrobial peptides patterns.

| Pattern                                                  | AMP                  |
|----------------------------------------------------------|----------------------|
| C. {6,15}C. {9,31}CC. {8,21}C.C. {13,35}C. {5,18}C       | LTP/2S ALBUMIN/ECA 1 |
| C. {5,13}C. {14,20}CC. {8,10}C. {10,32}C                 | LTP/2S ALBUMIN/ECA 1 |
| C. {4,25}C. {2,12}C. {3,4}C. {3,17}C. {4,32}C.C. {1,6}C  | DEFENSIN             |
| C. {2,14}C. {3,5}C. {3,16}C. {4,28}C.C                   | DEFENSIN             |
| C. {1,8}C. {4,5}CC. {5}C. {6}C. {3,5}C. {3,4}C           | HEVEIN               |
| C. {3}C. {3,4}C. {4,32}C. {2,3}C. {3,4}C                 | THONIN               |
| CC. {10,11}C. {8,10}C. {5}C. {7,10}C                     | THONIN               |
| C. {3}C. {3}C. {7,11}C. {3}C. {2}CC. {2}C. {11}C. {1,2}C | GASA/GAST/SNAKIN     |
