# Supplementary material for: Shedding Some Light over the Floral Metabolism by Arum Lily (Zantedeschia aethiopica) Spathe De Novo Transcriptome Assembly
Source: PubMed Central journal article supplement (PMC3948674; doi:10.1371/journal.pone.0090487), 2014-03-10
Supplement: pone.0090487.s019.pdf [file pone.0090487.s019.pdf]

Table S2: Summary of validation parameters of structural three-dimensional models

| Peptide | Class | Template | Dope Score  | Ramachandran Plot        |                     | G-Factor | Z-Score (PROSA II) |
|---------|-------|----------|-------------|--------------------------|---------------------|----------|--------------------|
|         |       |          |             | Most Favored Regions (%) | Allowed Regions (%) |          |                    |
| 3584    | LTP   | 2LJO     | -7205,93848 | 70,4                     | 27,2                | -0,10    | -4,26              |
| 5976    | LTP   | 2LJO     | -9223,97461 | 85,6                     | 8,9                 | -0,03    | -4,35              |
| 6924    | LTP   | 1FK5     | -9204,11816 | 85,2                     | 12,3                | 0,06     | -4,34              |
