# Supplementary material for: Shedding Some Light over the Floral Metabolism by Arum Lily (Zantedeschia aethiopica) Spathe De Novo Transcriptome Assembly
Source: PubMed Central journal article supplement (PMC3948674; doi:10.1371/journal.pone.0090487), 2014-03-10
Supplement: pone.0090487.s020.pdf [file pone.0090487.s020.pdf]

**Table S3:** TransDecoder remapping analysis. Table shows each KO RPKM sum.

| <b>KO</b> | <b>Sum (RPKM)</b> |
|-----------|-------------------|
| K00001    | 1111.94894269109  |
| K00002    | 3595.03714990616  |
| K00003    | 17.2938995361328  |
| K00008    | 85.9224967956543  |
| K00010    | 21.0415999889374  |
| K00011    | 323.246002197266  |
| K00012    | 1486.25495529175  |
| K00013    | 69.557502746582   |
| K00015    | 42.7831993103027  |
| K00016    | 9.2248772084713   |
| K00018    | 93.3740825653076  |
| K00020    | 306.218171596527  |
| K00021    | 53.4349012374878  |
| K00024    | 1734.0251531601   |
| K00025    | 1734.0251531601   |
| K00026    | 257.741457223892  |
| K00028    | 460.476608276367  |
| K00029    | 191.855697631836  |
| K00030    | 625.529983520508  |
| K00031    | 1054.24481472373  |
| K00033    | 546.764999389648  |
| K00036    | 2562.43783855438  |
| K00042    | 195.160900592804  |
| K00052    | 74.39990234375    |
| K00053    | 254.628005981445  |
| K00057    | 117.636476993561  |
| K00058    | 626.767780303955  |
| K00059    | 195.024396419525  |
| K00064    | 45.5119018554688  |
| K00067    | 9.94359970092773  |
| K00071    | 2.80611991882324  |
| K00074    | 263.2080078125    |
| K00075    | 33.8796005249023  |
| K00079    | 5.48699009418488  |
| K00081    | 4.09811007976532  |
| K00083    | 2582.86506509781  |
| K00084    | 4.09811007976532  |
| K00085    | 262.686004638672  |
| K00088    | 31.5824809074402  |
| K00091    | 108.604900360107  |
| K00099    | 213.427993774414  |
| K00100    | 971.084104597569  |
| K00102    | 145.142903327942  |
| K00106    | 83.3154983520508  |
| K00108    | 26.2812995910645  |
| K00111    | 159.173004150391  |

---

|        |                  |
|--------|------------------|
| K00117 | 13.3325996398926 |
| K00118 | 71.3867988586426 |
| K00119 | 26.2812995910645 |
| K00120 | 188.012498855591 |
| K00121 | 1383.80317491293 |
| K00122 | 1314.34428632259 |
| K00128 | 1242.73263835907 |
| K00130 | 202.036499023438 |
| K00131 | 121.620601654053 |
| K00133 | 962.571014404297 |
| K00134 | 987.286781787872 |
| K00135 | 100.122201919556 |
| K00139 | 100.122201919556 |
| K00140 | 247.345993041992 |
| K00142 | 6.31156015396118 |
| K00145 | 32.5996007919312 |
| K00146 | 324.260987281799 |
| K00161 | 252.739906311035 |
| K00162 | 543.752307891846 |
| K00164 | 93.3287963867188 |
| K00166 | 20.2229995727539 |
| K00167 | 145.328994750977 |
| K00207 | 175.039993286133 |
| K00208 | 50.8602981567383 |
| K00213 | 327.784004211426 |
| K00215 | 40.7970008850098 |
| K00218 | 27.1517601013184 |
| K00222 | 45.1472015380859 |
| K00224 | 289.566785812378 |
| K00225 | 26.5284004211426 |
| K00227 | 8.73085021972656 |
| K00228 | 75.9259033203125 |
| K00231 | 219.858296394348 |
| K00232 | 1569.3230805397  |
| K00234 | 897.281982421875 |
| K00235 | 349.122985839844 |
| K00249 | 81.1615982055664 |
| K00252 | 441.866320252419 |
| K00253 | 1166.55669403076 |
| K00254 | 10.0689001083374 |
| K00261 | 286.351761817932 |
| K00262 | 730.524677276611 |
| K00264 | 425.343530654907 |
| K00273 | 16.1068896055222 |
| K00276 | 433.397856712341 |
| K00278 | 29.5466003417969 |
| K00279 | 22.6740619242191 |
| K00281 | 193.1090965271   |
| K00284 | 363.909091949463 |
| K00286 | 28.7728004455566 |

---

---

|        |                  |
|--------|------------------|
| K00287 | 56.4034996032715 |
| K00288 | 111.559997558594 |
| K00292 | 43.9546012878418 |
| K00294 | 74.0639038085938 |
| K00295 | 290.963012695312 |
| K00297 | 921.543029785156 |
| K00303 | 34.6403007507324 |
| K00306 | 33.6150016784668 |
| K00318 | 16.6275005340576 |
| K00326 | 2188.29287719727 |
| K00327 | 323.603105545044 |
| K00328 | 134.835103988647 |
| K00329 | 51.7234001159668 |
| K00331 | 679.721984863281 |
| K00335 | 80.8668975830078 |
| K00336 | 245.251403808594 |
| K00344 | 634.254364967346 |
| K00355 | 48.1399002075195 |
| K00356 | 51.7234001159668 |
| K00360 | 3.28641998767853 |
| K00365 | 104.195999145508 |
| K00366 | 25.7693004608154 |
| K00382 | 359.314401626587 |
| K00383 | 243.681297302246 |
| K00384 | 99.4999980926514 |
| K00392 | 130.566902160645 |
| K00411 | 1335.97497558594 |
| K00413 | 440.134002685547 |
| K00417 | 351.593002319336 |
| K00422 | 16.5418707132339 |
| K00423 | 246.858927249908 |
| K00430 | 957.781803369522 |
| K00432 | 1249.00202941895 |
| K00433 | 1180.77767419815 |
| K00434 | 3112.31763148308 |
| K00435 | 229.585998535156 |
| K00441 | 22.826000213623  |
| K00451 | 76.3473968505859 |
| K00454 | 494.509068965912 |
| K00457 | 7.48529005050659 |
| K00469 | 297.329299926758 |
| K00470 | 1.30224001407623 |
| K00472 | 445.048898696899 |
| K00475 | 30.0273990631104 |
| K00478 | 45.8560981750488 |
| K00479 | 3.30985009670258 |
| K00480 | 319.315057516098 |
| K00485 | 182.346229076385 |
| K00487 | 141.804992675781 |
| K00492 | 65.7195892333984 |

---

---

|        |                  |
|--------|------------------|
| K00510 | 150.608881950378 |
| K00511 | 209.445999145508 |
| K00514 | 512.205549240112 |
| K00517 | 6378.24239832163 |
| K00520 | 448.45050239563  |
| K00522 | 1971.94015824795 |
| K00523 | 43.6950988769531 |
| K00528 | 26.1156367659569 |
| K00532 | 40.6459007263184 |
| K00535 | 230.837005615234 |
| K00540 | 483.797059595585 |
| K00547 | 20.7787990570068 |
| K00549 | 414.565994262695 |
| K00550 | 25.7133007049561 |
| K00551 | 67.00830078125   |
| K00555 | 72.4246753454208 |
| K00556 | 35.1629981994629 |
| K00558 | 54.8660273551941 |
| K00559 | 70.4466018676758 |
| K00565 | 117.240330457687 |
| K00566 | 23.1784992218018 |
| K00571 | 20.8651008605957 |
| K00573 | 28.2824697494507 |
| K00574 | 472.929023563862 |
| K00587 | 44.703498840332  |
| K00588 | 431.759429454803 |
| K00591 | 16.2169990539551 |
| K00592 | 262.625093460083 |
| K00599 | 413.776711463928 |
| K00600 | 543.542097091675 |
| K00601 | 21.1051006317139 |
| K00602 | 24.6147994995117 |
| K00603 | 32.94460105896   |
| K00604 | 12.6052103042603 |
| K00605 | 153.522003173828 |
| K00606 | 22.4260005950928 |
| K00609 | 149.347499847412 |
| K00615 | 435.0974868536   |
| K00616 | 592.798004150391 |
| K00620 | 123.800801992416 |
| K00621 | 16.1830005645752 |
| K00626 | 686.458866596222 |
| K00627 | 442.247901916504 |
| K00630 | 104.514995574951 |
| K00632 | 1932.07416629791 |
| K00640 | 192.232046127319 |
| K00645 | 137.674297332764 |
| K00648 | 122.540000915527 |
| K00652 | 6.3544699549675  |
| K00654 | 958.86309337616  |

---

---

|        |                  |
|--------|------------------|
| K00655 | 31.284999370575  |
| K00658 | 368.159507751465 |
| K00660 | 384.556054115295 |
| K00666 | 220.020998001099 |
| K00670 | 351.053199768066 |
| K00671 | 27.4599990844727 |
| K00676 | 54.1615982055664 |
| K00677 | 8.85692805051804 |
| K00679 | 92.7704422473907 |
| K00680 | 266.591768264771 |
| K00681 | 94.8388977050781 |
| K00683 | 392.696990966797 |
| K00685 | 53.8087997436523 |
| K00688 | 524.264596939087 |
| K00695 | 96.0685117840767 |
| K00696 | 421.687122821808 |
| K00697 | 691.046360135078 |
| K00700 | 74.032518863678  |
| K00703 | 58.0228707790375 |
| K00705 | 146.167191505432 |
| K00720 | 2.50026988983154 |
| K00721 | 68.2841033935547 |
| K00726 | 59.5755996704102 |
| K00728 | 163.973007202148 |
| K00729 | 43.956298828125  |
| K00734 | 146.849601745605 |
| K00736 | 49.0663986206055 |
| K00737 | 174.095199584961 |
| K00748 | 12.2753251791    |
| K00750 | 218.945400238037 |
| K00753 | 77.4065990447998 |
| K00754 | 21.7915000915527 |
| K00759 | 144.16708946228  |
| K00760 | 21.9827995300293 |
| K00761 | 50.6171989440918 |
| K00763 | 115.622699737549 |
| K00764 | 5.8215799331665  |
| K00765 | 77.6259002685547 |
| K00766 | 20.5494995117188 |
| K00767 | 91.0290985107422 |
| K00770 | 30.4192897081375 |
| K00771 | 29.8240604400635 |
| K00773 | 14.4055791497231 |
| K00777 | 93.5027723312378 |
| K00780 | 14.442750453949  |
| K00783 | 21.9722995758057 |
| K00784 | 41.0851001739502 |
| K00787 | 237.197992324829 |
| K00789 | 353.295799255371 |
| K00790 | 2.01167988777161 |

---

---

|        |                  |
|--------|------------------|
| K00791 | 30.2792701721191 |
| K00793 | 15.444899559021  |
| K00794 | 174.800003051758 |
| K00797 | 314.392902374268 |
| K00799 | 3004.84556293488 |
| K00800 | 67.7547988891602 |
| K00801 | 570.731002807617 |
| K00809 | 64.8417019844055 |
| K00812 | 52.969898223877  |
| K00813 | 357.570007324219 |
| K00814 | 617.610984802246 |
| K00815 | 174.394972324371 |
| K00817 | 68.2798004150391 |
| K00818 | 62.5903015136719 |
| K00819 | 77.497200012207  |
| K00820 | 57.2785987854004 |
| K00826 | 400.403336405754 |
| K00827 | 407.207234382629 |
| K00830 | 137.869995117188 |
| K00831 | 10.7159004211426 |
| K00833 | 7.43441987037659 |
| K00837 | 214.847791671753 |
| K00844 | 538.98366060853  |
| K00847 | 129.021232128143 |
| K00849 | 221.3287935853   |
| K00850 | 253.494522094727 |
| K00851 | 23.6402523517609 |
| K00852 | 21.4642095565796 |
| K00854 | 131.891401052475 |
| K00855 | 10.5171003341675 |
| K00856 | 648.755004882812 |
| K00858 | 157.047596931458 |
| K00859 | 68.3718032836914 |
| K00860 | 74.0191292762756 |
| K00861 | 1867.55606508255 |
| K00863 | 87.9117669388652 |
| K00864 | 150.269104003906 |
| K00865 | 88.9694976806641 |
| K00868 | 63.2603988647461 |
| K00870 | 107.772811889648 |
| K00872 | 259.015991210938 |
| K00873 | 2478.74663448334 |
| K00875 | 76.6073503494263 |
| K00876 | 177.989568591118 |
| K00878 | 23.468599319458  |
| K00884 | 26.7917995452881 |
| K00888 | 195.396101951599 |
| K00889 | 319.617972612381 |
| K00894 | 104.539480686188 |
| K00895 | 657.174892306328 |

---

---

|        |                  |
|--------|------------------|
| K00898 | 80.1334991455078 |
| K00899 | 45.1223983764648 |
| K00901 | 419.887035608292 |
| K00902 | 22.7227001190186 |
| K00908 | 1195.58630537987 |
| K00912 | 1.73342001438141 |
| K00913 | 183.499798774719 |
| K00914 | 31.9681503772736 |
| K00919 | 148.723299026489 |
| K00921 | 428.052958488464 |
| K00924 | 12924.1482329071 |
| K00927 | 86.0763127207756 |
| K00928 | 197.434701919556 |
| K00930 | 35.7896995544434 |
| K00936 | 17.3449704647064 |
| K00938 | 27.7408602237701 |
| K00939 | 442.738444507122 |
| K00940 | 592.402743339539 |
| K00942 | 244.52001285553  |
| K00943 | 89.1917972564697 |
| K00948 | 294.233309745789 |
| K00949 | 103.499911546707 |
| K00951 | 673.091468811035 |
| K00953 | 94.0886993408203 |
| K00960 | 6.47763013839722 |
| K00962 | 62.0818737149239 |
| K00963 | 164.945007324219 |
| K00965 | 23.7576007843018 |
| K00966 | 390.194007873535 |
| K00967 | 69.6691989898682 |
| K00968 | 182.819497108459 |
| K00970 | 28.31656062603   |
| K00971 | 348.633905410767 |
| K00972 | 32.3348999023438 |
| K00974 | 14.7978000640869 |
| K00975 | 445.289862751961 |
| K00979 | 63.5396995544434 |
| K00981 | 139.121021270752 |
| K00985 | 62.847900390625  |
| K00986 | 1.8826299905777  |
| K00987 | 15.298999786377  |
| K00991 | 105.68399810791  |
| K00993 | 278.554992675781 |
| K00995 | 67.6854019165039 |
| K00999 | 56.1452004909515 |
| K01001 | 217.852909088135 |
| K01003 | 9.69289970397949 |
| K01006 | 7.72996997833252 |
| K01007 | 86.0560989379883 |
| K01011 | 173.078895568848 |

---

---

|        |                  |
|--------|------------------|
| K01012 | 47.1058006286621 |
| K01046 | 289.712005615234 |
| K01047 | 21.6636803150177 |
| K01051 | 627.193214803934 |
| K01052 | 42.5297012329102 |
| K01054 | 436.43665933609  |
| K01056 | 58.6810593605042 |
| K01057 | 167.518506526947 |
| K01058 | 65.328501701355  |
| K01061 | 345.299970030785 |
| K01066 | 288.241594314575 |
| K01068 | 70.331298828125  |
| K01069 | 257.652832388878 |
| K01070 | 149.136001586914 |
| K01072 | 13.1330995559692 |
| K01074 | 240.32600402832  |
| K01076 | 70.331298828125  |
| K01078 | 273.729403734207 |
| K01079 | 230.141998291016 |
| K01080 | 45.9417881965637 |
| K01081 | 73.9580616950989 |
| K01082 | 35.5680289268494 |
| K01087 | 706.455159187317 |
| K01090 | 2555.01885318756 |
| K01091 | 41.9607009887695 |
| K01092 | 72.056999206543  |
| K01099 | 145.446399927139 |
| K01100 | 7.78542017936707 |
| K01101 | 534.943651556969 |
| K01102 | 564.30236530304  |
| K01103 | 152.239896774292 |
| K01104 | 402.935398101807 |
| K01106 | 6.50419998168945 |
| K01110 | 226.925825595856 |
| K01113 | 84.8121067285538 |
| K01114 | 162.343075871468 |
| K01115 | 813.059012115002 |
| K01126 | 77.6097893714905 |
| K01142 | 1.44562995433807 |
| K01143 | 124.880996704102 |
| K01144 | 67.0341987609863 |
| K01147 | 23.5802993774414 |
| K01148 | 47.0878396034241 |
| K01157 | 47.140998840332  |
| K01164 | 19.9186898469925 |
| K01166 | 254.305999755859 |
| K01170 | 84.0037002563477 |
| K01174 | 122.290302276611 |
| K01175 | 317.032125473022 |
| K01176 | 844.956832408905 |

---



---

|        |                  |
|--------|------------------|
| K01177 | 1177.93504929543 |
| K01179 | 440.991135299206 |
| K01180 | 6.29163980484009 |
| K01181 | 23.4122009277344 |
| K01183 | 20.2042492032051 |
| K01184 | 22.9551563858986 |
| K01187 | 147.742810368538 |
| K01188 | 589.663776315749 |
| K01190 | 189.197985649109 |
| K01191 | 78.3560590744019 |
| K01192 | 22.8105792999268 |
| K01193 | 1177.00646275282 |
| K01194 | 94.8274974822998 |
| K01196 | 4.29328012466431 |
| K01200 | 18.8871002197266 |
| K01205 | 69.3508996963501 |
| K01206 | 11.647500038147  |
| K01209 | 448.728603363037 |
| K01210 | 11.57493019104   |
| K01213 | 76.6707504987717 |
| K01227 | 58.0758018493652 |
| K01228 | 21.221700668335  |
| K01230 | 405.225083351135 |
| K01231 | 96.2213010787964 |
| K01238 | 119.987998962402 |
| K01243 | 16.8676500320435 |
| K01244 | 139.296005249023 |
| K01246 | 715.408468425274 |
| K01247 | 10.4867599010468 |
| K01249 | 331.135902404785 |
| K01251 | 649.639007568359 |
| K01253 | 77.0313410758972 |
| K01254 | 55.1979703903198 |
| K01255 | 339.769012451172 |
| K01256 | 282.744901657104 |
| K01259 | 62.3271994590759 |
| K01261 | 115.610000610352 |
| K01262 | 231.561677455902 |
| K01265 | 668.618602752686 |
| K01267 | 134.527896881104 |
| K01276 | 46.1181983947754 |
| K01277 | 14.938099861145  |
| K01278 | 37.7005996704102 |
| K01280 | 27.0227700471878 |
| K01285 | 262.899390220642 |
| K01301 | 8.86667990684509 |
| K01303 | 27.0028991699219 |
| K01304 | 111.718002319336 |
| K01307 | 42.7018013000488 |
| K01322 | 18.1359996795654 |

---

---

|        |                   |
|--------|-------------------|
| K01330 | 0.961641013622284 |
| K01338 | 503.633911132812  |
| K01354 | 93.5760941505432  |
| K01358 | 2104.98820495605  |
| K01362 | 828.261652648449  |
| K01363 | 1008.96997070312  |
| K01365 | 9.78134614229202  |
| K01366 | 1445.90074443817  |
| K01367 | 20.2276000976562  |
| K01369 | 97.5084959864616  |
| K01373 | 855.630104064941  |
| K01376 | 2013.46166592836  |
| K01381 | 46.1365995407104  |
| K01392 | 5.23423004150391  |
| K01404 | 54.8471093177795  |
| K01408 | 208.084874153137  |
| K01409 | 40.7531900405884  |
| K01410 | 23.1444796323776  |
| K01411 | 44.6912994384766  |
| K01412 | 740.777871608734  |
| K01414 | 356.166481018066  |
| K01415 | 72.6543006896973  |
| K01417 | 70.3814010620117  |
| K01423 | 96.7320995330811  |
| K01425 | 94.8869018554688  |
| K01426 | 78.5847117900848  |
| K01427 | 3.82495999336243  |
| K01431 | 148.994003295898  |
| K01433 | 39.7485585212708  |
| K01436 | 24.5156002044678  |
| K01438 | 79.4928970336914  |
| K01444 | 28.5352001190186  |
| K01454 | 30.5432638525963  |
| K01455 | 13.8861799240112  |
| K01456 | 125.697298049927  |
| K01462 | 86.6686117649078  |
| K01463 | 50.2170633673668  |
| K01464 | 186.211692810059  |
| K01465 | 44.1408996582031  |
| K01466 | 45.3946990966797  |
| K01469 | 19.9506196975708  |
| K01476 | 197.574806213379  |
| K01480 | 64.4304962158203  |
| K01487 | 336.501800537109  |
| K01488 | 93.0955991744995  |
| K01489 | 41.5629005432129  |
| K01490 | 14.2059001922607  |
| K01491 | 129.532098770142  |
| K01493 | 1.96501004695892  |
| K01495 | 81.8081970214844  |

---

---

|        |                   |
|--------|-------------------|
| K01500 | 4.07294988632202  |
| K01501 | 37.5693998336792  |
| K01505 | 38.1837301254272  |
| K01506 | 38.8586006164551  |
| K01507 | 1663.59610939026  |
| K01509 | 241.717008113861  |
| K01510 | 384.195499420166  |
| K01511 | 3.3497200012207   |
| K01512 | 12.6823997497559  |
| K01513 | 44.6079912185669  |
| K01514 | 62.3777121007442  |
| K01517 | 12.6702995300293  |
| K01520 | 1.43854999542236  |
| K01522 | 89.4982986450195  |
| K01527 | 382.466209411621  |
| K01528 | 496.755805969238  |
| K01529 | 394.068988293409  |
| K01530 | 347.714001536369  |
| K01531 | 3.24745988845825  |
| K01533 | 173.203908443451  |
| K01534 | 75.8805999755859  |
| K01535 | 334.567261278629  |
| K01537 | 470.410005331039  |
| K01551 | 166.212997436523  |
| K01552 | 15.2299003601074  |
| K01553 | 37.6152670383453  |
| K01554 | 25.9489898681641  |
| K01555 | 155.590698242188  |
| K01557 | 118.872001647949  |
| K01563 | 8.52956962585449  |
| K01567 | 302.015951156616  |
| K01568 | 7548.25388336182  |
| K01580 | 596.985506057739  |
| K01582 | 26.1177005767822  |
| K01583 | 106.028299331665  |
| K01586 | 42.0555992126465  |
| K01587 | 0.281094998121262 |
| K01590 | 88.9422912597656  |
| K01592 | 48.1094210147858  |
| K01593 | 48.1094210147858  |
| K01595 | 614.375405311584  |
| K01597 | 155.885097503662  |
| K01598 | 76.6517405509949  |
| K01599 | 720.22367477417   |
| K01601 | 55.6173000335693  |
| K01602 | 195.360992431641  |
| K01609 | 35.3069000244141  |
| K01610 | 37.6196913719177  |
| K01611 | 1044.66732633114  |
| K01613 | 101.342103004456  |

---

---

|        |                  |
|--------|------------------|
| K01618 | 80.3270034790039 |
| K01620 | 164.621600151062 |
| K01623 | 1344.61526447535 |
| K01625 | 2.77722001075745 |
| K01626 | 88.4545974731445 |
| K01627 | 24.5664005279541 |
| K01633 | 56.3951988220215 |
| K01634 | 261.424705505371 |
| K01640 | 70.3460998535156 |
| K01641 | 825.66202878952  |
| K01647 | 603.505996704102 |
| K01648 | 608.043296813965 |
| K01649 | 29.0123130679131 |
| K01652 | 28.5160999298096 |
| K01653 | 238.789505004883 |
| K01657 | 14.3488998413086 |
| K01658 | 129.552993774414 |
| K01661 | 4.78654003143311 |
| K01662 | 69.4405794143677 |
| K01663 | 32.5086002349854 |
| K01669 | 227.496101617813 |
| K01674 | 16.8415200710297 |
| K01679 | 49.1357002258301 |
| K01681 | 217.294994354248 |
| K01687 | 17.193000793457  |
| K01689 | 1774.44003629684 |
| K01692 | 329.203701019287 |
| K01695 | 207.697601318359 |
| K01696 | 54.322699546814  |
| K01698 | 202.039001464844 |
| K01703 | 159.268005371094 |
| K01704 | 140.667007446289 |
| K01710 | 326.130996704102 |
| K01711 | 102.319000244141 |
| K01714 | 62.4940986633301 |
| K01718 | 55.1633005142212 |
| K01719 | 38.7613997459412 |
| K01723 | 100.877501487732 |
| K01725 | 73.7807998657227 |
| K01728 | 20.3990993499756 |
| K01733 | 2454.1298828125  |
| K01735 | 143.404998779297 |
| K01736 | 138.304992675781 |
| K01738 | 818.377481460571 |
| K01739 | 316.317993164062 |
| K01741 | 14.6663298606873 |
| K01743 | 29.9097003936768 |
| K01746 | 32.94460105896   |
| K01749 | 201.557998657227 |
| K01750 | 3.72233009338379 |

---

---

|        |                  |
|--------|------------------|
| K01754 | 5032.86074447632 |
| K01755 | 43.9669990539551 |
| K01756 | 42.9420013427734 |
| K01757 | 204.199421644211 |
| K01758 | 8.92618012428284 |
| K01759 | 581.25860440731  |
| K01760 | 51.2693500518799 |
| K01761 | 184.475997924805 |
| K01768 | 164.518801689148 |
| K01770 | 247.236999511719 |
| K01772 | 619.140014648438 |
| K01778 | 110.579002380371 |
| K01779 | 59.0435981750488 |
| K01783 | 451.625007629395 |
| K01784 | 794.608372449875 |
| K01785 | 457.966105461121 |
| K01792 | 419.128705978394 |
| K01798 | 5.19784021377563 |
| K01800 | 151.412994384766 |
| K01802 | 2456.71159756184 |
| K01803 | 1535.47601318359 |
| K01805 | 593.879028320312 |
| K01807 | 274.135662913322 |
| K01809 | 198.876007080078 |
| K01810 | 333.186547994614 |
| K01814 | 10.5544004440308 |
| K01817 | 46.3526000976562 |
| K01823 | 144.425003051758 |
| K01824 | 189.457992553711 |
| K01829 | 392.087089538574 |
| K01834 | 1423.5791965723  |
| K01835 | 425.268894195557 |
| K01836 | 129.803839683533 |
| K01837 | 1.20511996746063 |
| K01838 | 274.779459476471 |
| K01840 | 651.803607940674 |
| K01845 | 178.961086392403 |
| K01850 | 198.285999298096 |
| K01852 | 37.0511016845703 |
| K01853 | 37.0511016845703 |
| K01855 | 25.0858072042465 |
| K01858 | 113.721000671387 |
| K01859 | 95.0971984863281 |
| K01866 | 100.317203521729 |
| K01867 | 123.371720314026 |
| K01868 | 452.701705932617 |
| K01869 | 93.7886674404144 |
| K01870 | 171.084202408791 |
| K01872 | 100.957391738892 |
| K01873 | 59.2445497512817 |

---

---

|        |                  |
|--------|------------------|
| K01874 | 366.405298709869 |
| K01875 | 166.500200271606 |
| K01876 | 217.869386196136 |
| K01880 | 148.459800720215 |
| K01881 | 372.774936437607 |
| K01883 | 251.890099525452 |
| K01885 | 111.554298400879 |
| K01886 | 53.9564018249512 |
| K01887 | 184.582595825195 |
| K01889 | 124.651500701904 |
| K01890 | 44.0453987121582 |
| K01892 | 82.1538009643555 |
| K01893 | 230.499002456665 |
| K01895 | 212.571998596191 |
| K01897 | 1633.92917633057 |
| K01899 | 547.232986450195 |
| K01900 | 458.702987670898 |
| K01904 | 31.3710913956165 |
| K01913 | 213.942699432373 |
| K01915 | 748.143787384033 |
| K01918 | 112.929100036621 |
| K01919 | 230.647694885731 |
| K01920 | 145.567510128021 |
| K01921 | 3.78663003444672 |
| K01922 | 55.1226997375488 |
| K01923 | 21.864200592041  |
| K01925 | 19.1807101964951 |
| K01928 | 12.3961100578308 |
| K01930 | 158.455497205257 |
| K01931 | 326.607275485992 |
| K01934 | 126.207908153534 |
| K01937 | 296.17297077179  |
| K01938 | 111.559997558594 |
| K01939 | 78.6592025756836 |
| K01940 | 156.610500335693 |
| K01942 | 22.6646995544434 |
| K01945 | 9.10822010040283 |
| K01950 | 123.870899200439 |
| K01951 | 64.8839015960693 |
| K01952 | 36.5932404994965 |
| K01953 | 2101.79632246494 |
| K01955 | 41.5807499885559 |
| K01956 | 82.0192031860352 |
| K01957 | 2.39006996154785 |
| K01961 | 134.588800430298 |
| K01962 | 221.666105270386 |
| K01963 | 1.99987995624542 |
| K01968 | 266.567202568054 |
| K01969 | 268.358800888062 |
| K01976 | 134.192380070686 |

---

---

|        |                   |
|--------|-------------------|
| K02006 | 23.6324005126953  |
| K02008 | 40.2234992980957  |
| K02021 | 27.7636301517487  |
| K02055 | 15.8754997253418  |
| K02057 | 39.7361488342285  |
| K02065 | 75.3479387760162  |
| K02066 | 77.3753967285156  |
| K02067 | 33.9031982421875  |
| K02068 | 9.40038967132568  |
| K02069 | 138.539001464844  |
| K02078 | 7.38790988922119  |
| K02083 | 265.280006408691  |
| K02087 | 61.837100982666   |
| K02090 | 61.837100982666   |
| K02109 | 12.7496995925903  |
| K02111 | 28.5755591392517  |
| K02112 | 5.83893990516663  |
| K02113 | 260.091003417969  |
| K02114 | 3.70797991752625  |
| K02115 | 22.8798999786377  |
| K02116 | 125.741996765137  |
| K02118 | 837.611999511719  |
| K02132 | 23.0259990692139  |
| K02133 | 430.401046991348  |
| K02134 | 351.961990356445  |
| K02136 | 564.462701797485  |
| K02137 | 718.637023925781  |
| K02138 | 585.257995605469  |
| K02140 | 1279.70575714111  |
| K02144 | 242.158004760742  |
| K02145 | 652.830792874098  |
| K02146 | 260.25            |
| K02147 | 1010.62800598145  |
| K02148 | 262.881988525391  |
| K02149 | 156.343994140625  |
| K02150 | 621.886996984482  |
| K02152 | 1240.93005371094  |
| K02154 | 444.750392913818  |
| K02155 | 913.116027832031  |
| K02160 | 93.8839988708496  |
| K02180 | 18.3260998725891  |
| K02183 | 2931.14917159081  |
| K02193 | 14.4545001983643  |
| K02201 | 31.3413200378418  |
| K02202 | 52.8250007629395  |
| K02206 | 61.837100982666   |
| K02208 | 187.38809967041   |
| K02210 | 0.921788990497589 |
| K02212 | 0.71779602766037  |
| K02218 | 1005.55814671516  |

---

---

|        |                  |
|--------|------------------|
| K02221 | 31.3178901672363 |
| K02234 | 43.8869787454605 |
| K02257 | 147.334302902222 |
| K02258 | 27.0088996887207 |
| K02259 | 35.9826011657715 |
| K02263 | 270.068359851837 |
| K02265 | 501.855987548828 |
| K02266 | 1052.4999294281  |
| K02267 | 128.268997192383 |
| K02291 | 96.3131999969482 |
| K02292 | 12.4692001342773 |
| K02293 | 73.2534027099609 |
| K02294 | 2.63740992546082 |
| K02295 | 53.0517501831055 |
| K02302 | 19.5830001831055 |
| K02303 | 19.5830001831055 |
| K02320 | 3.99423003196716 |
| K02321 | 10.8554501533508 |
| K02324 | 22.6996411681175 |
| K02327 | 8.1304098367691  |
| K02328 | 3.5166699886322  |
| K02331 | 7.41769981384277 |
| K02335 | 53.9692702293396 |
| K02342 | 71.6233601570129 |
| K02343 | 7.91045999526978 |
| K02349 | 6.66744804382324 |
| K02350 | 60.696830034256  |
| K02355 | 377.066898345947 |
| K02356 | 54.4181808233261 |
| K02357 | 41.8380012512207 |
| K02358 | 78.0438995361328 |
| K02365 | 7.23823302984238 |
| K02366 | 9.65869045257568 |
| K02367 | 16.8613495826721 |
| K02370 | 11.7904996871948 |
| K02371 | 17.660400390625  |
| K02372 | 220.388006210327 |
| K02377 | 81.2914962768555 |
| K02427 | 4.15826988220215 |
| K02433 | 300.395785927773 |
| K02434 | 54.1084003448486 |
| K02437 | 124.366877555847 |
| K02438 | 255.191000938416 |
| K02469 | 24.0260291099548 |
| K02470 | 21.4946799278259 |
| K02471 | 20.9941005706787 |
| K02485 | 60.0263996124268 |
| K02492 | 14.2671003341675 |
| K02493 | 5.50079011917114 |
| K02495 | 1.88182896375656 |

---



---

|        |                  |
|--------|------------------|
| K02503 | 466.941612243652 |
| K02510 | 9.68663024902344 |
| K02516 | 33.2883005142212 |
| K02519 | 54.9852981567383 |
| K02520 | 106.660003662109 |
| K02527 | 12.0261201858521 |
| K02528 | 13.149299621582  |
| K02535 | 4.56780004501343 |
| K02536 | 33.2911987304688 |
| K02540 | 0.74881899356842 |
| K02541 | 2.41955995559692 |
| K02548 | 5.33853006362915 |
| K02549 | 55.8893013000488 |
| K02552 | 3.15228009223938 |
| K02553 | 550.259498596191 |
| K02563 | 7.78847980499268 |
| K02575 | 0.9966099858284  |
| K02604 | 13.532600402832  |
| K02606 | 2.14514994621277 |
| K02634 | 5.09998989105225 |
| K02636 | 33.622200012207  |
| K02638 | 13.0290002822876 |
| K02639 | 3392.7094669342  |
| K02641 | 302.360103607178 |
| K02687 | 6.45888996124268 |
| K02689 | 16.0636859238148 |
| K02690 | 5.38440990447998 |
| K02694 | 107.352996826172 |
| K02698 | 51.6934013366699 |
| K02701 | 30.8474998474121 |
| K02704 | 4.27963018417358 |
| K02716 | 590.017028808594 |
| K02717 | 496.394008636475 |
| K02721 | 388.365386962891 |
| K02723 | 134.351265907288 |
| K02725 | 260.160003662109 |
| K02726 | 271.123992919922 |
| K02727 | 203.921005249023 |
| K02728 | 122.391998291016 |
| K02729 | 569.746002197266 |
| K02730 | 346.915985107422 |
| K02731 | 178.248701095581 |
| K02732 | 222.908004760742 |
| K02734 | 255.175994873047 |
| K02735 | 203.554000854492 |
| K02736 | 189.563995361328 |
| K02737 | 353.498001098633 |
| K02738 | 269.737293243408 |
| K02739 | 482.409889221191 |
| K02830 | 12.7897996902466 |

---

---

|        |                  |
|--------|------------------|
| K02834 | 91.8583984375    |
| K02835 | 27.7892999649048 |
| K02836 | 130.037307977676 |
| K02838 | 159.068803787231 |
| K02861 | 45.8620986938477 |
| K02863 | 367.427324771881 |
| K02864 | 49.0643997192383 |
| K02865 | 971.453253626823 |
| K02866 | 869.650119066238 |
| K02867 | 38.1350994110107 |
| K02868 | 276.689211606979 |
| K02870 | 216.61934697628  |
| K02871 | 370.514507293701 |
| K02872 | 2.09846997261047 |
| K02873 | 345.456114292145 |
| K02874 | 22.4305000305176 |
| K02875 | 467.686660885811 |
| K02876 | 187.700798034668 |
| K02877 | 362.46809899807  |
| K02879 | 193.824895858765 |
| K02880 | 931.0242228508   |
| K02881 | 165.058272838593 |
| K02882 | 0.69718998670578 |
| K02883 | 679.730275690556 |
| K02884 | 307.285003662109 |
| K02885 | 728.101632118225 |
| K02886 | 64.8311996459961 |
| K02887 | 19.7987995147705 |
| K02888 | 189.033004760742 |
| K02889 | 504.390065670013 |
| K02891 | 266.675994873047 |
| K02893 | 798.085699319839 |
| K02894 | 1281.81714451313 |
| K02895 | 373.137096405029 |
| K02896 | 1040.36229717731 |
| K02897 | 71.3493013381958 |
| K02898 | 823.176203370094 |
| K02899 | 182.697006225586 |
| K02900 | 2.21650004386902 |
| K02901 | 317.560492217541 |
| K02903 | 732.745025634766 |
| K02904 | 404.002990722656 |
| K02906 | 162.008102416992 |
| K02909 | 82.3713989257812 |
| K02910 | 608.869300723076 |
| K02912 | 968.044982910156 |
| K02915 | 1981.82995605469 |
| K02917 | 1587.02655887604 |
| K02918 | 406.929722011089 |
| K02920 | 721.017018318176 |

---

---

|        |                   |
|--------|-------------------|
| K02925 | 1212.45542800426  |
| K02926 | 295.778991699219  |
| K02929 | 799.118988037109  |
| K02930 | 235.118055105209  |
| K02931 | 388.542999267578  |
| K02932 | 837.608299612999  |
| K02933 | 537.147994995117  |
| K02934 | 699.019097328186  |
| K02935 | 153.297899246216  |
| K02936 | 827.90755546093   |
| K02937 | 577.268424272537  |
| K02938 | 420.857928752899  |
| K02939 | 174.373003005981  |
| K02940 | 1242.47500634193  |
| K02941 | 800.739530205727  |
| K02942 | 605.321014404297  |
| K02943 | 1025.23772192001  |
| K02945 | 394.200292110443  |
| K02946 | 195.985992431641  |
| K02949 | 440.301318049431  |
| K02951 | 580.518945097923  |
| K02953 | 334.717010498047  |
| K02954 | 57.6285018920898  |
| K02955 | 590.128070116043  |
| K02957 | 789.173281669617  |
| K02958 | 867.442993164062  |
| K02960 | 513.992605209351  |
| K02961 | 30.2583999633789  |
| K02964 | 649.207501411438  |
| K02965 | 88.9452972412109  |
| K02966 | 927.389705777168  |
| K02969 | 359.217738986015  |
| K02971 | 505.502014160156  |
| K02973 | 1054.2967416048   |
| K02974 | 405.235219955444  |
| K02975 | 588.27430999279   |
| K02977 | 2.22612804174423  |
| K02979 | 6.30544996261597  |
| K02981 | 217.708999633789  |
| K02983 | 0.286606997251511 |
| K02984 | 533.787144899368  |
| K02985 | 335.51047873497   |
| K02986 | 1.35459005832672  |
| K02987 | 419.439419865608  |
| K02988 | 196.744995117188  |
| K02989 | 256.166278958321  |
| K02990 | 138.962997436523  |
| K02991 | 792.924178123474  |
| K02992 | 255.126998901367  |
| K02993 | 1.01627004146576  |

---

---

|        |                  |
|--------|------------------|
| K02995 | 323.084361195564 |
| K02996 | 533.163005828857 |
| K02997 | 882.281112253666 |
| K02998 | 421.573881983757 |
| K02999 | 27.2739605903625 |
| K03000 | 32.7112998962402 |
| K03002 | 10.3640003204346 |
| K03005 | 28.3258991241455 |
| K03006 | 46.9356755316257 |
| K03008 | 150.6756067276   |
| K03010 | 131.239601373672 |
| K03011 | 88.8003997802734 |
| K03013 | 158.211101531982 |
| K03014 | 459.199005126953 |
| K03015 | 576.076591491699 |
| K03016 | 267.985533952713 |
| K03017 | 88.2735977172852 |
| K03018 | 10.7470703125    |
| K03020 | 49.1101989746094 |
| K03021 | 11.8010997772217 |
| K03022 | 25.5412006378174 |
| K03023 | 46.3787002563477 |
| K03024 | 6.78423976898193 |
| K03026 | 32.7501804828644 |
| K03027 | 14.2119998931885 |
| K03028 | 108.947769165039 |
| K03029 | 296.410705566406 |
| K03030 | 230.251998901367 |
| K03031 | 335.794006347656 |
| K03032 | 187.937994003296 |
| K03033 | 282.276596069336 |
| K03035 | 214.111999511719 |
| K03036 | 120.578002929688 |
| K03037 | 164.281005859375 |
| K03038 | 221.063003540039 |
| K03039 | 357.740997314453 |
| K03040 | 5.54146003723145 |
| K03043 | 1.84174001216888 |
| K03046 | 4.84173011779785 |
| K03061 | 1581.6880607605  |
| K03062 | 455.934997558594 |
| K03063 | 208.300003051758 |
| K03064 | 117.560997009277 |
| K03065 | 182.727005004883 |
| K03066 | 49.5999984741211 |
| K03070 | 53.4547591209412 |
| K03076 | 12.7839002609253 |
| K03083 | 602.13960647583  |
| K03086 | 2.44468998908997 |
| K03087 | 21.4604704380035 |

---

---

|        |                  |
|--------|------------------|
| K03093 | 8.75973987579346 |
| K03094 | 1244.70416116714 |
| K03097 | 351.226997375488 |
| K03098 | 35.0144996643066 |
| K03100 | 358.820789337158 |
| K03104 | 110.850997924805 |
| K03105 | 427.734008789062 |
| K03106 | 314.449199676514 |
| K03107 | 64.9386978149414 |
| K03108 | 87.2253017425537 |
| K03109 | 54.9217987060547 |
| K03110 | 65.1527004241943 |
| K03111 | 16.9587903022766 |
| K03113 | 2818.59301757812 |
| K03115 | 256.276911735535 |
| K03116 | 258.446990966797 |
| K03118 | 179.473999023438 |
| K03120 | 69.1643981933594 |
| K03122 | 116.046997070312 |
| K03123 | 178.349201202393 |
| K03124 | 172.688670158386 |
| K03125 | 30.615870475769  |
| K03126 | 66.0779099464417 |
| K03127 | 30.1026202440262 |
| K03128 | 49.2798302173615 |
| K03130 | 29.6202993392944 |
| K03131 | 70.5040969848633 |
| K03132 | 71.0442962646484 |
| K03135 | 31.9745998382568 |
| K03136 | 78.0832014083862 |
| K03137 | 239.821055412292 |
| K03138 | 238.981094360352 |
| K03139 | 93.8600006103516 |
| K03140 | 240.564601898193 |
| K03141 | 30.4943099021912 |
| K03142 | 25.8215999603271 |
| K03143 | 30.3302011489868 |
| K03144 | 52.614138841629  |
| K03145 | 55.1316986083984 |
| K03147 | 110.361999511719 |
| K03152 | 120.209247112274 |
| K03155 | 249.622072696686 |
| K03163 | 88.1620998382568 |
| K03165 | 360.145946800709 |
| K03167 | 37.7045001983643 |
| K03168 | 8.10414981842041 |
| K03169 | 153.074398040771 |
| K03177 | 48.7758712768555 |
| K03178 | 204.263998985291 |
| K03183 | 58.1079205274582 |

---

---

|        |                  |
|--------|------------------|
| K03188 | 288.343561410904 |
| K03189 | 97.4539031982422 |
| K03190 | 60.5163993835449 |
| K03217 | 1055.63645386696 |
| K03231 | 4098.58376014233 |
| K03232 | 243.214174151421 |
| K03233 | 516.286047816277 |
| K03234 | 594.925176203251 |
| K03236 | 516.848999023438 |
| K03237 | 100.147003173828 |
| K03238 | 346.317993164062 |
| K03239 | 49.0422999858856 |
| K03240 | 114.510299682617 |
| K03241 | 75.1773986816406 |
| K03242 | 195.165596008301 |
| K03243 | 177.329498291016 |
| K03245 | 42.035099029541  |
| K03246 | 285.299011230469 |
| K03247 | 437.286987304688 |
| K03248 | 750.797819137573 |
| K03249 | 61.5617980957031 |
| K03250 | 694.56201171875  |
| K03251 | 28.2915000915527 |
| K03252 | 56.9730987548828 |
| K03253 | 207.197410702705 |
| K03254 | 170.435400009155 |
| K03255 | 20.7150001525879 |
| K03256 | 6.35669994354248 |
| K03257 | 1181.93948459625 |
| K03259 | 1557.17600250244 |
| K03260 | 606.16202673316  |
| K03262 | 832.630989074707 |
| K03263 | 534.414254456758 |
| K03264 | 154.570297241211 |
| K03265 | 149.789993286133 |
| K03267 | 110.350997924805 |
| K03281 | 54.7837114334106 |
| K03283 | 4497.10841315985 |
| K03292 | 57.910099029541  |
| K03294 | 175.503379821777 |
| K03301 | 432.016090393066 |
| K03304 | 14.0845701694489 |
| K03319 | 89.4394989013672 |
| K03320 | 36.5256996154785 |
| K03321 | 57.4641990661621 |
| K03322 | 21.4943714141846 |
| K03327 | 618.846621632576 |
| K03347 | 206.579620718956 |
| K03348 | 6.33640992641449 |
| K03349 | 6.37740993499756 |

---

---

|        |                  |
|--------|------------------|
| K03350 | 11.2560195922852 |
| K03351 | 3.18653011322021 |
| K03352 | 4.90098989009857 |
| K03353 | 2.98379993438721 |
| K03354 | 18.7530002593994 |
| K03355 | 6.36994981765747 |
| K03357 | 40.6343994140625 |
| K03361 | 44.0503997802734 |
| K03362 | 2.17650008201599 |
| K03363 | 152.895749092102 |
| K03364 | 515.602832794189 |
| K03384 | 4.33634704351425 |
| K03386 | 1535.00182831287 |
| K03403 | 4.43614000082016 |
| K03404 | 42.0805015563965 |
| K03405 | 60.0873985290527 |
| K03417 | 2295.97998046875 |
| K03424 | 46.566499710083  |
| K03426 | 45.8432998657227 |
| K03428 | 2.32652997970581 |
| K03434 | 30.397539973259  |
| K03437 | 5.01599979400635 |
| K03438 | 27.0608997344971 |
| K03439 | 103.080927371979 |
| K03453 | 228.80324369669  |
| K03454 | 1151.91044461727 |
| K03455 | 199.00071811676  |
| K03456 | 269.096008300781 |
| K03457 | 103.006050109863 |
| K03469 | 28.6372900009155 |
| K03495 | 36.3086878061295 |
| K03500 | 4.51259994506836 |
| K03501 | 20.7352695465088 |
| K03504 | 37.5335006713867 |
| K03509 | 6.27459001541138 |
| K03511 | 42.7901992797852 |
| K03512 | 1.74214005470276 |
| K03514 | 75.4683594703674 |
| K03515 | 112.237003564835 |
| K03517 | 67.4324016571045 |
| K03521 | 57.6156005859375 |
| K03522 | 38.2061996459961 |
| K03526 | 358.390014648438 |
| K03527 | 553.645004272461 |
| K03531 | 136.647199630737 |
| K03537 | 15.6007995605469 |
| K03538 | 34.6342010498047 |
| K03539 | 29.3688402175903 |
| K03541 | 709.6669921875   |
| K03542 | 46.3305015563965 |

---

---

|        |                  |
|--------|------------------|
| K03544 | 308.66496348381  |
| K03545 | 34.0265998840332 |
| K03549 | 2245.75520306826 |
| K03553 | 57.5511906147003 |
| K03564 | 12.6680002212524 |
| K03574 | 59.0839083194733 |
| K03575 | 3.44297003746033 |
| K03593 | 120.287979841232 |
| K03595 | 152.35279917717  |
| K03596 | 151.222501754761 |
| K03609 | 17.0951995849609 |
| K03626 | 120.256625235081 |
| K03627 | 2294.46538352966 |
| K03635 | 3.35111999511719 |
| K03639 | 53.6867738962173 |
| K03644 | 92.3027992248535 |
| K03648 | 11.9188003540039 |
| K03650 | 11.6035599708557 |
| K03652 | 11.5403499603271 |
| K03654 | 41.6196002960205 |
| K03655 | 4.5734601020813  |
| K03661 | 207.572998046875 |
| K03665 | 38.5558013916016 |
| K03671 | 5350.33284473419 |
| K03676 | 661.170997619629 |
| K03678 | 13.3662004470825 |
| K03679 | 26.4440002441406 |
| K03680 | 107.644397735596 |
| K03681 | 95.2737584114075 |
| K03686 | 716.624580144882 |
| K03687 | 536.696300506592 |
| K03688 | 344.509502410889 |
| K03691 | 76.183198928833  |
| K03695 | 186.381324231625 |
| K03696 | 813.036987304688 |
| K03699 | 146.815998077393 |
| K03707 | 75.1799011230469 |
| K03714 | 17.4752006530762 |
| K03715 | 58.8456099033356 |
| K03723 | 19.6478395462036 |
| K03731 | 7.34096002578735 |
| K03750 | 74.7049007415771 |
| K03754 | 39.2024002075195 |
| K03767 | 738.122284531593 |
| K03768 | 1275.70249998569 |
| K03772 | 12.1408996582031 |
| K03781 | 1436.41900634766 |
| K03787 | 87.3318023681641 |
| K03797 | 79.9765303134918 |
| K03798 | 1151.27291712165 |

---



---

|        |                  |
|--------|------------------|
| K03800 | 20.1219997406006 |
| K03801 | 54.9339008331299 |
| K03809 | 644.560205459595 |
| K03834 | 3.08477008342743 |
| K03841 | 271.555104374886 |
| K03842 | 107.114501953125 |
| K03843 | 43.9597015380859 |
| K03844 | 32.617849946022  |
| K03845 | 28.9380596876144 |
| K03846 | 21.2371997833252 |
| K03847 | 15.7341003417969 |
| K03848 | 16.7699704170227 |
| K03849 | 12.4853000640869 |
| K03850 | 44.6804401874542 |
| K03853 | 20.2276000976562 |
| K03857 | 567.799272119999 |
| K03859 | 301.521697998047 |
| K03860 | 20.2581996917725 |
| K03861 | 24.6837005615234 |
| K03869 | 85.2924003601074 |
| K03872 | 267.471008300781 |
| K03875 | 95.6965026855469 |
| K03876 | 8.01933002471924 |
| K03879 | 3.32475996017456 |
| K03884 | 4.03601980209351 |
| K03885 | 336.58616065979  |
| K03919 | 9.46354007720947 |
| K03921 | 240.254752397537 |
| K03926 | 64.5343198776245 |
| K03934 | 245.251403808594 |
| K03936 | 590.452324867249 |
| K03937 | 253.231994628906 |
| K03940 | 679.721984863281 |
| K03941 | 602.296981811523 |
| K03942 | 570.396606445312 |
| K03943 | 477.773010253906 |
| K03949 | 179.227996826172 |
| K03950 | 144.507995605469 |
| K03952 | 230.772003173828 |
| K03953 | 138.164001464844 |
| K03955 | 328.214902877808 |
| K03965 | 258.207000732422 |
| K03966 | 328.778015136719 |
| K03969 | 190.429520130157 |
| K03977 | 75.0303993225098 |
| K03978 | 11.8038601875305 |
| K03979 | 229.207459449768 |
| K04035 | 59.8269996643066 |
| K04040 | 22.7418003082275 |
| K04043 | 1366.94924640656 |

---

---

|        |                   |
|--------|-------------------|
| K04077 | 2572.99923580885  |
| K04078 | 1560.47660446167  |
| K04079 | 738.954788386822  |
| K04082 | 44.828498840332   |
| K04120 | 9.06954956054688  |
| K04121 | 33.4344961047173  |
| K04122 | 19.4969396591187  |
| K04123 | 1.95489001274109  |
| K04124 | 71.4765014648438  |
| K04125 | 4.39607107639313  |
| K04127 | 91.5038986206055  |
| K04228 | 9.26159000396729  |
| K04345 | 500.602880001068  |
| K04354 | 362.632612794638  |
| K04368 | 550.570611476898  |
| K04371 | 701.281601905823  |
| K04374 | 0.469125002622604 |
| K04382 | 283.069400787354  |
| K04392 | 268.092971801758  |
| K04417 | 24.8531999588013  |
| K04418 | 207.441802978516  |
| K04422 | 123.852996826172  |
| K04424 | 627.83914655447   |
| K04427 | 94.8869018554688  |
| K04437 | 6.94747018814087  |
| K04457 | 84.7126998901367  |
| K04459 | 102.078895568848  |
| K04460 | 161.567195892334  |
| K04461 | 84.7126998901367  |
| K04482 | 4.16118001937866  |
| K04485 | 4.22038984298706  |
| K04487 | 80.2944030761719  |
| K04488 | 690.7490234375    |
| K04496 | 30.1585006713867  |
| K04498 | 16.2747898101807  |
| K04499 | 16.7609004974365  |
| K04505 | 13.6372995376587  |
| K04506 | 326.651203155518  |
| K04507 | 273.241607666016  |
| K04508 | 97.8936996459961  |
| K04512 | 85.6488099098206  |
| K04513 | 0.323383986949921 |
| K04518 | 129.070877552032  |
| K04520 | 1.28575003147125  |
| K04523 | 221.499898910522  |
| K04524 | 0.504033029079437 |
| K04532 | 71.8110990524292  |
| K04536 | 45.6885986328125  |
| K04551 | 39.9519996643066  |
| K04554 | 242.988192081451  |

---

---

|        |                  |
|--------|------------------|
| K04563 | 61.837100982666  |
| K04564 | 423.110092163086 |
| K04565 | 2659.10865783691 |
| K04567 | 72.3997497558594 |
| K04569 | 33.3026008605957 |
| K04602 | 56.8749008178711 |
| K04640 | 316.318323135376 |
| K04646 | 325.517101287842 |
| K04649 | 75.1209030151367 |
| K04650 | 25.0564994812012 |
| K04681 | 47.3396987915039 |
| K04683 | 60.0931087732315 |
| K04688 | 108.321998596191 |
| K04705 | 166.473495483398 |
| K04706 | 70.6442613601685 |
| K04708 | 3.51732993125916 |
| K04709 | 37.9886016845703 |
| K04711 | 95.6651992797852 |
| K04712 | 23.4109992980957 |
| K04713 | 494.835494995117 |
| K04715 | 54.0287598371506 |
| K04716 | 60.6525402069092 |
| K04718 | 105.754429101944 |
| K04728 | 615.427226066589 |
| K04733 | 3326.41453355551 |
| K04751 | 58.5578002929688 |
| K04752 | 58.5578002929688 |
| K04755 | 54.2432398796082 |
| K04773 | 54.5211982727051 |
| K04794 | 56.3488998413086 |
| K04797 | 94.4794006347656 |
| K04798 | 110.450996398926 |
| K04799 | 54.8292999267578 |
| K04802 | 4.90742015838623 |
| K04883 | 110.860000610352 |
| K04909 | 18.7383003234863 |
| K04910 | 13.9378004074097 |
| K05016 | 241.693705022335 |
| K05021 | 121.706203460693 |
| K05022 | 76.5511016845703 |
| K05024 | 76.5511016845703 |
| K05025 | 76.5511016845703 |
| K05084 | 72.0019989013672 |
| K05236 | 534.218231201172 |
| K05275 | 1295.42137336731 |
| K05277 | 62.2016070485115 |
| K05278 | 101.305797576904 |
| K05279 | 183.329803466797 |
| K05280 | 185.562562942505 |
| K05283 | 30.7455005645752 |

---

---

|        |                  |
|--------|------------------|
| K05284 | 11.6878597736359 |
| K05285 | 7.16684007644653 |
| K05286 | 19.2829598784447 |
| K05287 | 12.1014995574951 |
| K05288 | 42.2753009796143 |
| K05289 | 60.6766014099121 |
| K05290 | 191.884498596191 |
| K05291 | 43.65149974823   |
| K05292 | 48.9475871920586 |
| K05293 | 24.8278007507324 |
| K05298 | 84.9586029052734 |
| K05302 | 6.13169002532959 |
| K05305 | 25.6235008239746 |
| K05309 | 26.6126003265381 |
| K05310 | 17.367870092392  |
| K05349 | 1546.62557220459 |
| K05350 | 319.567206859589 |
| K05356 | 305.691986083984 |
| K05366 | 8.01951003074646 |
| K05387 | 266.895588874817 |
| K05389 | 20.7904102802277 |
| K05391 | 467.25243294239  |
| K05395 | 48.1399002075195 |
| K05396 | 14.8532100915909 |
| K05399 | 126.535130023956 |
| K05516 | 260.736466884613 |
| K05520 | 97.5991020202637 |
| K05535 | 71.8992004394531 |
| K05539 | 5.81391000747681 |
| K05542 | 9.82419967651367 |
| K05543 | 23.0196399688721 |
| K05544 | 54.2806015014648 |
| K05545 | 9.82419967651367 |
| K05546 | 147.220897674561 |
| K05575 | 1.29928004741669 |
| K05577 | 5.4209201335907  |
| K05579 | 2.97718000411987 |
| K05581 | 5.4698600769043  |
| K05584 | 5.87788009643555 |
| K05585 | 10.8425998687744 |
| K05592 | 237.276720523834 |
| K05605 | 117.349697113037 |
| K05607 | 55.1217002868652 |
| K05609 | 424.614017009735 |
| K05610 | 131.979797363281 |
| K05643 | 11.1111221313477 |
| K05648 | 7.29349994659424 |
| K05655 | 4.31959998607635 |
| K05656 | 15.89035987854   |
| K05657 | 4.93018007278442 |

---

---

|        |                  |
|--------|------------------|
| K05658 | 238.033983469009 |
| K05663 | 25.5608997344971 |
| K05664 | 10.5342998504639 |
| K05665 | 179.937608957291 |
| K05666 | 315.45115852356  |
| K05667 | 160.514449357986 |
| K05668 | 119.160040855408 |
| K05671 | 49.701099395752  |
| K05673 | 103.368452072144 |
| K05674 | 4.43347990512848 |
| K05677 | 67.6767997741699 |
| K05680 | 71.2293977737427 |
| K05681 | 1141.36479246616 |
| K05692 | 2754.63441419601 |
| K05715 | 74.6334816217422 |
| K05732 | 71.4860000610352 |
| K05743 | 16.2339000701904 |
| K05747 | 23.6354999542236 |
| K05749 | 22.7201995849609 |
| K05750 | 28.4900989532471 |
| K05754 | 164.550994873047 |
| K05755 | 10.019700050354  |
| K05756 | 204.449005126953 |
| K05757 | 89.4590015411377 |
| K05758 | 95.3267412185669 |
| K05759 | 382.790985107422 |
| K05765 | 1985.79498672485 |
| K05766 | 187.587295532227 |
| K05768 | 210.495700061321 |
| K05794 | 45.9682006835938 |
| K05841 | 170.836183190346 |
| K05849 | 27.2702698707581 |
| K05853 | 228.953510761261 |
| K05857 | 280.744916796684 |
| K05858 | 281.432907104492 |
| K05863 | 1719.01062965393 |
| K05864 | 27.7390003204346 |
| K05882 | 6.28918981552124 |
| K05885 | 102.034253418446 |
| K05894 | 333.739948272705 |
| K05906 | 8.72272968292236 |
| K05907 | 2.8696300983429  |
| K05917 | 237.979995727539 |
| K05925 | 66.6275005340576 |
| K05928 | 69.7251968383789 |
| K05929 | 17.2982997894287 |
| K05931 | 86.7132034301758 |
| K05933 | 60.9865307807922 |
| K05954 | 58.0644016265869 |
| K05955 | 101.169902801514 |

---

---

|        |                  |
|--------|------------------|
| K05956 | 167.497226715088 |
| K05962 | 15.9176204204559 |
| K05982 | 35.0431495904922 |
| K05986 | 85.856201171875  |
| K05989 | 85.5203018188477 |
| K05993 | 110.05374789238  |
| K06001 | 11.6323003768921 |
| K06013 | 195.004104614258 |
| K06016 | 54.380199432373  |
| K06022 | 20.2133197784424 |
| K06027 | 39.0741996765137 |
| K06041 | 33.648998260498  |
| K06062 | 26.6695003509521 |
| K06063 | 53.7703018188477 |
| K06066 | 39.3795013427734 |
| K06067 | 127.186690270901 |
| K06072 | 32.7706985473633 |
| K06085 | 32.6130981445312 |
| K06096 | 7.02496004104614 |
| K06100 | 43.0260567963123 |
| K06101 | 37.2634010314941 |
| K06110 | 35.2536010742188 |
| K06111 | 33.4600982666016 |
| K06115 | 28.4418992996216 |
| K06118 | 28.0107002258301 |
| K06119 | 48.1535987854004 |
| K06123 | 24.3931999206543 |
| K06125 | 7.13259983062744 |
| K06126 | 233.776397705078 |
| K06127 | 56.2518005371094 |
| K06129 | 14.4146003723145 |
| K06130 | 204.412105560303 |
| K06133 | 12.418380022049  |
| K06147 | 75.835560798645  |
| K06158 | 338.250991821289 |
| K06167 | 23.0954999923706 |
| K06168 | 14.177300453186  |
| K06170 | 67.3106002807617 |
| K06171 | 24.2784996032715 |
| K06172 | 130.231994628906 |
| K06173 | 69.4871606826782 |
| K06174 | 269.562004089355 |
| K06179 | 29.1644291877747 |
| K06180 | 20.4949402809143 |
| K06184 | 32.8479995727539 |
| K06185 | 2119.19364929199 |
| K06189 | 2.85245990753174 |
| K06195 | 48.9798011779785 |
| K06196 | 90.2385025024414 |
| K06207 | 101.048198699951 |

---

---

|        |                   |
|--------|-------------------|
| K06210 | 54.5432004928589  |
| K06215 | 100.346000671387  |
| K06221 | 0.737551987171173 |
| K06236 | 77.0241012573242  |
| K06268 | 447.922902941704  |
| K06269 | 521.4928150177    |
| K06272 | 12.3318004608154  |
| K06276 | 76.3311004638672  |
| K06287 | 71.3601505756378  |
| K06316 | 16.592139840126   |
| K06324 | 37.8494987487793  |
| K06390 | 26.0656299591064  |
| K06413 | 7.67081022262573  |
| K06442 | 18.8980007171631  |
| K06443 | 78.9232025146484  |
| K06444 | 27.7300705909729  |
| K06515 | 29.6404991149902  |
| K06611 | 477.594352424145  |
| K06620 | 9.06424999237061  |
| K06628 | 6.23796987533569  |
| K06630 | 1459.52415573597  |
| K06634 | 136.780097961426  |
| K06636 | 30.6998805999756  |
| K06638 | 11.6280002593994  |
| K06640 | 5.78834295272827  |
| K06653 | 71.8992004394531  |
| K06662 | 10.7448997497559  |
| K06664 | 35.3566017150879  |
| K06669 | 46.2556991577148  |
| K06670 | 1.90383005142212  |
| K06671 | 30.4009990692139  |
| K06672 | 58.9147005081177  |
| K06676 | 77.1069782376289  |
| K06678 | 0.491916000843048 |
| K06683 | 16.2301998138428  |
| K06685 | 382.928409576416  |
| K06689 | 6520.27793419361  |
| K06692 | 28.7586002349854  |
| K06693 | 27.3285999298096  |
| K06694 | 86.9897081851959  |
| K06699 | 55.0897998809814  |
| K06700 | 65.1652984619141  |
| K06867 | 554.2239112854    |
| K06872 | 15.1651000976562  |
| K06874 | 121.876300811768  |
| K06875 | 295.308013916016  |
| K06883 | 844.88729763031   |
| K06885 | 5.87544012069702  |
| K06889 | 405.170224189758  |
| K06890 | 686.5830078125    |

---

---

|        |                  |
|--------|------------------|
| K06891 | 112.200996398926 |
| K06892 | 881.740831553936 |
| K06896 | 33.2703018188477 |
| K06900 | 30.8513004779816 |
| K06901 | 3.1519900560379  |
| K06911 | 9.68884992599487 |
| K06916 | 227.663990259171 |
| K06927 | 5.76557016372681 |
| K06928 | 15.4725999832153 |
| K06940 | 119.231002807617 |
| K06941 | 137.940898895264 |
| K06942 | 328.388893127441 |
| K06943 | 102.653302311897 |
| K06944 | 684.284175872803 |
| K06945 | 127.476997375488 |
| K06947 | 24.3183994293213 |
| K06948 | 19.7175550460815 |
| K06949 | 49.1208992004395 |
| K06950 | 9.27132034301758 |
| K06955 | 163.637802124023 |
| K06961 | 94.5118026733398 |
| K06962 | 44.3259010314941 |
| K06963 | 49.7593994140625 |
| K06965 | 53.1166000366211 |
| K06966 | 264.138391017914 |
| K06969 | 18.1331748366356 |
| K06972 | 76.3665008544922 |
| K06980 | 59.4747009277344 |
| K06981 | 36.2178001403809 |
| K06990 | 78.7301025390625 |
| K06995 | 68.3414993286133 |
| K06997 | 520.315979003906 |
| K06998 | 51.405101776123  |
| K07007 | 2.65307796001434 |
| K07011 | 1.93313002586365 |
| K07015 | 74.8672103881836 |
| K07018 | 14.4858999252319 |
| K07019 | 23.0880002975464 |
| K07020 | 1.3972100019455  |
| K07021 | 13.5796003341675 |
| K07023 | 129.816898345947 |
| K07024 | 152.366697311401 |
| K07025 | 252.537070512772 |
| K07029 | 128.142200469971 |
| K07036 | 11.4800996780396 |
| K07042 | 6.25538015365601 |
| K07046 | 22.6940002441406 |
| K07047 | 6.04330015182495 |
| K07052 | 118.441157817841 |
| K07053 | 37.3768005371094 |

---



---

|        |                  |
|--------|------------------|
| K07055 | 133.686499595642 |
| K07056 | 9.47428035736084 |
| K07059 | 254.009199142456 |
| K07071 | 34.1996994018555 |
| K07088 | 558.057893693447 |
| K07095 | 452.642105102539 |
| K07107 | 11.7861995697021 |
| K07114 | 202.044994354248 |
| K07119 | 768.023597717285 |
| K07126 | 72.3374004364014 |
| K07130 | 176.74299621582  |
| K07137 | 10.6548004150391 |
| K07140 | 35.7498006820679 |
| K07146 | 33.232608795166  |
| K07151 | 82.8595008850098 |
| K07152 | 28.1908392906189 |
| K07178 | 21.4123992919922 |
| K07179 | 21.6771602630615 |
| K07182 | 489.792695999146 |
| K07192 | 48.1663017272949 |
| K07195 | 361.597654342651 |
| K07198 | 443.229949444532 |
| K07199 | 457.660110473633 |
| K07203 | 22.2513008117676 |
| K07204 | 57.9026985168457 |
| K07226 | 87.2109985351562 |
| K07232 | 104.290539264679 |
| K07238 | 23.8024997711182 |
| K07243 | 64.7067031860352 |
| K07249 | 324.260987281799 |
| K07252 | 95.4051036834717 |
| K07253 | 795.56508731842  |
| K07263 | 65.4086990356445 |
| K07276 | 28.7192001342773 |
| K07277 | 194.545223236084 |
| K07297 | 93.999498128891  |
| K07300 | 246.908070087433 |
| K07304 | 136.430503845215 |
| K07305 | 180.481002807617 |
| K07359 | 239.240997314453 |
| K07374 | 1260.39889836311 |
| K07375 | 1418.06572210789 |
| K07385 | 42.894100189209  |
| K07390 | 659.863014221191 |
| K07393 | 537.441297531128 |
| K07399 | 9.51204991340637 |
| K07407 | 142.44390130043  |
| K07432 | 54.3098001480103 |
| K07441 | 20.3285999298096 |
| K07442 | 24.3458995819092 |

---

---

|        |                   |
|--------|-------------------|
| K07447 | 18.5873538851738  |
| K07454 | 18.0709991455078  |
| K07456 | 8.50493001937866  |
| K07466 | 596.078094482422  |
| K07478 | 3.46282005310059  |
| K07497 | 56.4496632218361  |
| K07498 | 10.3930997848511  |
| K07512 | 10.7791996002197  |
| K07513 | 1932.07416629791  |
| K07541 | 61.7563600540161  |
| K07542 | 68.9071400165558  |
| K07555 | 18.699800491333   |
| K07556 | 26.2693004608154  |
| K07562 | 131.851596832275  |
| K07565 | 21.1361999511719  |
| K07566 | 268.791884422302  |
| K07567 | 144.595993041992  |
| K07573 | 67.698600769043   |
| K07575 | 150.427001953125  |
| K07579 | 43.3749008178711  |
| K07583 | 9.72465991973877  |
| K07604 | 0.681761026382446 |
| K07735 | 48.9668006896973  |
| K07739 | 274.798904418945  |
| K07744 | 1066.30004882812  |
| K07748 | 99.1720514297485  |
| K07750 | 264.760851860046  |
| K07759 | 25.6906026601791  |
| K07760 | 209.479301452637  |
| K07761 | 20.1138687729836  |
| K07765 | 40.1065139770508  |
| K07767 | 93.7394008636475  |
| K07857 | 0.323383986949921 |
| K07863 | 268.092971801758  |
| K07870 | 248.331201553345  |
| K07874 | 826.43098449707   |
| K07875 | 115.610000610352  |
| K07876 | 474.540985107422  |
| K07877 | 287.187294006348  |
| K07878 | 209.121994018555  |
| K07881 | 78.065299987793   |
| K07884 | 115.436996459961  |
| K07887 | 385.365900039673  |
| K07888 | 371.822799682617  |
| K07889 | 426.766899108887  |
| K07890 | 45.121898651123   |
| K07893 | 442.975196838379  |
| K07897 | 293.779998779297  |
| K07901 | 340.635009765625  |
| K07904 | 397.273696899414  |

---

---

|        |                   |
|--------|-------------------|
| K07905 | 397.273696899414  |
| K07910 | 213.972593307495  |
| K07933 | 39.5568990707397  |
| K07936 | 620.566753208637  |
| K07937 | 1485.47899532318  |
| K07942 | 66.0055999755859  |
| K07943 | 33.3111701011658  |
| K07949 | 162.455001831055  |
| K07950 | 162.455001831055  |
| K07953 | 310.835998535156  |
| K07955 | 387.199289321899  |
| K07956 | 387.199289321899  |
| K07964 | 72.0199701786041  |
| K07975 | 268.092971801758  |
| K07976 | 2305.05423259735  |
| K07977 | 6100.57231998444  |
| K08008 | 34.6738986968994  |
| K08051 | 725.122985839844  |
| K08054 | 752.355495452881  |
| K08056 | 0.420026987791061 |
| K08057 | 734.718470960855  |
| K08059 | 141.641998291016  |
| K08064 | 218.525268316269  |
| K08065 | 301.961827278137  |
| K08066 | 153.716898798943  |
| K08070 | 726.334452629089  |
| K08081 | 510.704417705536  |
| K08094 | 17.3661994934082  |
| K08099 | 29.7066993713379  |
| K08101 | 12.1859798431396  |
| K08136 | 6.26989984512329  |
| K08137 | 138.766899108887  |
| K08139 | 495.986160516739  |
| K08145 | 98.0688095092773  |
| K08149 | 46.8790988922119  |
| K08150 | 151.188791275024  |
| K08151 | 59.0989718437195  |
| K08176 | 87.5596008300781  |
| K08179 | 0.815407991409302 |
| K08193 | 107.129590034485  |
| K08202 | 5.40863287448883  |
| K08232 | 367.940101623535  |
| K08233 | 0.784802973270416 |
| K08235 | 650.053874015808  |
| K08237 | 124.049282550812  |
| K08238 | 8.68982982635498  |
| K08241 | 310.560946702957  |
| K08242 | 23.051700592041   |
| K08244 | 813.25540137291   |
| K08245 | 831.985120415688  |

---

---

|        |                  |
|--------|------------------|
| K08247 | 28.5615005493164 |
| K08248 | 37.3450387716293 |
| K08249 | 327.605997085571 |
| K08252 | 34.0499000549316 |
| K08253 | 77.0313410758972 |
| K08266 | 68.5319905281067 |
| K08269 | 100.352551102638 |
| K08272 | 476.489208221436 |
| K08282 | 424.972623467445 |
| K08286 | 1225.84369027615 |
| K08287 | 653.306364536285 |
| K08288 | 139.583137333393 |
| K08296 | 26.8971004486084 |
| K08311 | 103.702003479004 |
| K08316 | 33.4919013977051 |
| K08332 | 293.968985319138 |
| K08333 | 57.1051998138428 |
| K08334 | 179.25719833374  |
| K08337 | 132.188609838486 |
| K08339 | 45.1338005065918 |
| K08341 | 1523.71200561523 |
| K08342 | 80.7847023010254 |
| K08343 | 97.3187026977539 |
| K08360 | 34.9982986450195 |
| K08369 | 21.5317993164062 |
| K08467 | 47.7243003845215 |
| K08472 | 647.350777983665 |
| K08486 | 227.541694641113 |
| K08488 | 267.477996826172 |
| K08489 | 99.1703996658325 |
| K08490 | 39.8479995727539 |
| K08492 | 43.4332008361816 |
| K08493 | 133.973297119141 |
| K08494 | 117.860000610352 |
| K08495 | 175.895402908325 |
| K08496 | 52.7966003417969 |
| K08497 | 52.7416000366211 |
| K08498 | 161.315200805664 |
| K08500 | 161.315200805664 |
| K08501 | 1.28218996524811 |
| K08503 | 159.683389306068 |
| K08504 | 839.777984619141 |
| K08505 | 525.719970703125 |
| K08506 | 192.147003173828 |
| K08507 | 29.4422607421875 |
| K08509 | 146.371002197266 |
| K08511 | 575.147986412048 |
| K08515 | 712.821997642517 |
| K08516 | 307.276000976562 |
| K08517 | 104.137001037598 |

---

---

|        |                   |
|--------|-------------------|
| K08518 | 15.0395796298981  |
| K08573 | 20.2276000976562  |
| K08577 | 20.2276000976562  |
| K08578 | 20.2276000976562  |
| K08580 | 20.2276000976562  |
| K08592 | 19.4566993713379  |
| K08596 | 6.68955993652344  |
| K08597 | 67.4021987915039  |
| K08653 | 94.7154998779297  |
| K08657 | 5.89858984947205  |
| K08658 | 193.138000488281  |
| K08675 | 8.95942974090576  |
| K08679 | 115.054899215698  |
| K08681 | 67.1728973388672  |
| K08695 | 191.056592941284  |
| K08711 | 258.26739525795   |
| K08712 | 13.2113003730774  |
| K08727 | 23.7525005340576  |
| K08730 | 31.3577501773834  |
| K08734 | 16.0187304019928  |
| K08735 | 80.020601272583   |
| K08736 | 3.62541007995605  |
| K08737 | 5.60299295186996  |
| K08738 | 485.334312438965  |
| K08739 | 7.7918039560318   |
| K08740 | 9.94931983947754  |
| K08741 | 0.965762972831726 |
| K08742 | 171.108701705933  |
| K08744 | 15.3933000564575  |
| K08764 | 335.914001464844  |
| K08769 | 245.654998779297  |
| K08770 | 1625.28129196167  |
| K08773 | 179.786003112793  |
| K08775 | 3.0476188659668   |
| K08776 | 100.640098571777  |
| K08789 | 75.0233099460602  |
| K08790 | 146.953596115112  |
| K08803 | 72.7166118621826  |
| K08817 | 45.5282001495361  |
| K08818 | 313.540600776672  |
| K08819 | 407.344369888306  |
| K08823 | 21.7752902507782  |
| K08825 | 228.112917900085  |
| K08827 | 38.4712098836899  |
| K08829 | 1700.61958599091  |
| K08830 | 336.365504264832  |
| K08832 | 81.8362998962402  |
| K08835 | 81.5295649468899  |
| K08838 | 5.73047006130219  |
| K08839 | 10.8190210461617  |

---

---

|        |                   |
|--------|-------------------|
| K08849 | 26.2953205108643  |
| K08850 | 8.52655029296875  |
| K08851 | 24.9652299880981  |
| K08852 | 172.265646934509  |
| K08853 | 173.609001159668  |
| K08856 | 356.552001953125  |
| K08857 | 282.338079452515  |
| K08864 | 12.693699836731   |
| K08866 | 6.39369988441467  |
| K08867 | 2.55550003051758  |
| K08869 | 2528.97303652763  |
| K08873 | 35.2199494838715  |
| K08874 | 19.5145421624184  |
| K08876 | 116.957698822021  |
| K08880 | 9.60426044464111  |
| K08882 | 0.316231995820999 |
| K08892 | 6.50894021987915  |
| K08900 | 173.794440984726  |
| K08901 | 13.0423004627228  |
| K08903 | 2.00205993652344  |
| K08907 | 57.4758987426758  |
| K08908 | 2.2749400138855   |
| K08909 | 34.9233016967773  |
| K08911 | 8.06713962554932  |
| K08912 | 269.287764072418  |
| K08913 | 269.287764072418  |
| K08914 | 269.287764072418  |
| K08915 | 79.1585006713867  |
| K08916 | 72.8170013427734  |
| K08917 | 138.804992675781  |
| K08955 | 140.676498413086  |
| K08956 | 125.097868919373  |
| K08957 | 50.3193900585175  |
| K08959 | 801.144916534424  |
| K08960 | 860.359345912933  |
| K08963 | 125.027599334717  |
| K08967 | 151.942001342773  |
| K08991 | 8.418869972229    |
| K08997 | 109.537002563477  |
| K08999 | 815.091888427734  |
| K09008 | 169.100997924805  |
| K09013 | 219.417198181152  |
| K09014 | 213.175994873047  |
| K09015 | 41.8384017944336  |
| K09020 | 2.63583993911743  |
| K09060 | 175.813529491425  |
| K09122 | 15.7258200645447  |
| K09131 | 43.2382011413574  |
| K09140 | 45.9810981750488  |
| K09187 | 26.9241008758545  |

---

---

|        |                   |
|--------|-------------------|
| K09191 | 91.0580024719238  |
| K09201 | 21.2651996612549  |
| K09228 | 21.2651996612549  |
| K09250 | 178.369641065598  |
| K09257 | 14.1241097450256  |
| K09264 | 3171.76292091608  |
| K09272 | 40.4567985534668  |
| K09276 | 0.650139987468719 |
| K09284 | 65.2024890780449  |
| K09285 | 16.8475396633148  |
| K09286 | 1682.91659474373  |
| K09287 | 23.128999710083   |
| K09291 | 41.9471802711487  |
| K09313 | 67.3815002441406  |
| K09338 | 1563.70388120413  |
| K09367 | 0.979059994220734 |
| K09377 | 522.409694671631  |
| K09414 | 47.7738592028618  |
| K09415 | 26.6669006347656  |
| K09417 | 21.8799991607666  |
| K09419 | 20.9631004333496  |
| K09422 | 1342.16524958611  |
| K09448 | 1422.10005283356  |
| K09454 | 23.4548101425171  |
| K09458 | 174.693678855896  |
| K09480 | 121.811798095703  |
| K09486 | 1080.77700483799  |
| K09487 | 364.661987304688  |
| K09489 | 152.31091594696   |
| K09490 | 3169.48765861988  |
| K09493 | 452.065200805664  |
| K09494 | 170.452901646495  |
| K09495 | 211.316898345947  |
| K09496 | 31.7642993927002  |
| K09497 | 179.709424853325  |
| K09498 | 36.7680015563965  |
| K09499 | 118.928497314453  |
| K09500 | 69.8867888450623  |
| K09502 | 944.171020507812  |
| K09503 | 2299.85596001148  |
| K09504 | 82.6983003616333  |
| K09505 | 1014.00872039795  |
| K09506 | 18.5960006713867  |
| K09507 | 69.8376998901367  |
| K09510 | 342.460597276688  |
| K09511 | 69.8376998901367  |
| K09512 | 2.07453989982605  |
| K09514 | 2.07453989982605  |
| K09515 | 69.8376998901367  |
| K09516 | 54.4059982299805  |

---

---

|        |                  |
|--------|------------------|
| K09517 | 70.2128982543945 |
| K09518 | 193.094617843628 |
| K09519 | 52.7359008789062 |
| K09521 | 69.8376998901367 |
| K09522 | 54.4203987121582 |
| K09523 | 29.9679002761841 |
| K09527 | 60.7058000564575 |
| K09528 | 65.2425003051758 |
| K09529 | 18.9662990570068 |
| K09531 | 11.0956001281738 |
| K09533 | 59.9228982925415 |
| K09534 | 228.502504348755 |
| K09540 | 489.865699768066 |
| K09548 | 121.769996643066 |
| K09549 | 289.358001708984 |
| K09550 | 222.434997558594 |
| K09553 | 372.9328956604   |
| K09560 | 431.216493099928 |
| K09561 | 89.6854019165039 |
| K09562 | 43.3568000793457 |
| K09564 | 17.1784992218018 |
| K09565 | 682.108004331589 |
| K09566 | 57.834400177002  |
| K09567 | 1.82011997699738 |
| K09569 | 753.297973632812 |
| K09571 | 264.847232431173 |
| K09580 | 605.96598815918  |
| K09584 | 309.690023541451 |
| K09587 | 3.96883988380432 |
| K09588 | 80.5289001464844 |
| K09590 | 5.24597012996674 |
| K09595 | 877.602020263672 |
| K09597 | 350.884994506836 |
| K09598 | 156.847899436951 |
| K09602 | 109.429000854492 |
| K09613 | 39.9329986572266 |
| K09645 | 47.3955001831055 |
| K09646 | 52.8390598297119 |
| K09648 | 26.327600479126  |
| K09650 | 74.6815032958984 |
| K09651 | 38.3082008361816 |
| K09660 | 144.147994995117 |
| K09667 | 230.779300689697 |
| K09680 | 119.101398468018 |
| K09699 | 121.541999816895 |
| K09701 | 16.1056995391846 |
| K09705 | 175.012195587158 |
| K09710 | 131.136993408203 |
| K09753 | 1682.49377185106 |
| K09754 | 13.2881002426147 |

---



---

|        |                   |
|--------|-------------------|
| K09755 | 140.680420398712  |
| K09756 | 7.2433500289917   |
| K09761 | 11.6326999664307  |
| K09773 | 22.3419404029846  |
| K09775 | 86.9691009521484  |
| K09828 | 4.48972988128662  |
| K09833 | 51.357400894165   |
| K09834 | 18.3020000457764  |
| K09835 | 29.3181009292603  |
| K09837 | 421.696196079254  |
| K09838 | 13.8315000534058  |
| K09839 | 69.1056003570557  |
| K09840 | 757.780765533447  |
| K09841 | 67.6712305545807  |
| K09842 | 190.622599005699  |
| K09843 | 40.0179901123047  |
| K09872 | 1262.70466899872  |
| K09873 | 340.841993808746  |
| K09874 | 70.1205315589905  |
| K09875 | 173.967800140381  |
| K09880 | 808.864990234375  |
| K09885 | 16.1846899986267  |
| K09903 | 122.886659145355  |
| K09919 | 92.8693008422852  |
| K09955 | 148.088302612305  |
| K10046 | 99.9224014282227  |
| K10047 | 87.0839004516602  |
| K10084 | 61.8337703943253  |
| K10085 | 29.8016300201416  |
| K10088 | 52.2714996337891  |
| K10130 | 9.06620979309082  |
| K10134 | 91.9854965209961  |
| K10140 | 18.0313600301743  |
| K10143 | 108.36371922493   |
| K10144 | 720.52681350708   |
| K10145 | 0.391525000333786 |
| K10146 | 0.391525000333786 |
| K10151 | 10.7552291154861  |
| K10158 | 51.6637992858887  |
| K10206 | 143.910995483398  |
| K10251 | 143.495302200317  |
| K10255 | 104.281101226807  |
| K10256 | 498.975397109985  |
| K10257 | 296.232886791229  |
| K10258 | 416.058442115784  |
| K10259 | 32.8880996704102  |
| K10260 | 47.5485796928406  |
| K10268 | 403.387385129929  |
| K10290 | 48.2109985351562  |
| K10293 | 34.5979804992676  |

---

---

|        |                  |
|--------|------------------|
| K10295 | 136.872299194336 |
| K10317 | 9.06767988204956 |
| K10325 | 5.00630021095276 |
| K10352 | 6.96324014663696 |
| K10355 | 2752.28311920166 |
| K10356 | 92.8415063619614 |
| K10357 | 60.9194984436035 |
| K10359 | 9.98461008071899 |
| K10364 | 9.89959025382996 |
| K10365 | 6.28869009017944 |
| K10380 | 481.95112156868  |
| K10389 | 18.6921005249023 |
| K10393 | 333.500694274902 |
| K10394 | 8.1080904006958  |
| K10395 | 8.27917957305908 |
| K10398 | 58.9452697038651 |
| K10400 | 7.71132290363312 |
| K10401 | 56.9114999771118 |
| K10405 | 2.32592010498047 |
| K10406 | 37.0151901245117 |
| K10407 | 89.1596984863281 |
| K10418 | 6.06362009048462 |
| K10436 | 72.5820999145508 |
| K10442 | 8.30263996124268 |
| K10443 | 52.1128997802734 |
| K10455 | 27.2071390151978 |
| K10456 | 120.63200378418  |
| K10457 | 16.7194995880127 |
| K10458 | 62.5525016784668 |
| K10464 | 81.5961990356445 |
| K10469 | 30.6159992218018 |
| K10477 | 23.5304503440857 |
| K10521 | 67.8475036621094 |
| K10523 | 62.6638011932373 |
| K10525 | 179.511001586914 |
| K10526 | 76.6980485022068 |
| K10527 | 1823.3588886261  |
| K10528 | 3.05868005752563 |
| K10532 | 226.50341796875  |
| K10536 | 117.975696563721 |
| K10563 | 10.9111995697021 |
| K10569 | 20.6203002929688 |
| K10570 | 10.5347003936768 |
| K10571 | 19.9428205490112 |
| K10572 | 57.2112503051758 |
| K10573 | 1604.82995605469 |
| K10574 | 1604.82995605469 |
| K10575 | 284.00700378418  |
| K10576 | 282.79639339447  |
| K10577 | 569.53099822998  |

---

---

|        |                  |
|--------|------------------|
| K10578 | 347.463989257812 |
| K10579 | 1943.39895629883 |
| K10581 | 227.588113665581 |
| K10583 | 50.539559841156  |
| K10588 | 42.6166000366211 |
| K10589 | 80.2765312194824 |
| K10590 | 219.26189994812  |
| K10591 | 48.0462007522583 |
| K10592 | 260.881056308746 |
| K10594 | 487.102996826172 |
| K10595 | 39.2161908149719 |
| K10597 | 178.348701477051 |
| K10598 | 449.356488227844 |
| K10599 | 46.3623008728027 |
| K10604 | 56.3308982849121 |
| K10606 | 19.7951799631119 |
| K10609 | 358.831920981407 |
| K10610 | 102.030571937561 |
| K10614 | 72.4419021606445 |
| K10615 | 72.4419021606445 |
| K10629 | 201.604904174805 |
| K10631 | 76.6415023803711 |
| K10632 | 43.6804008483887 |
| K10636 | 79.4001007080078 |
| K10638 | 13.2178798019886 |
| K10639 | 77.5440477132797 |
| K10640 | 65.4673004150391 |
| K10643 | 82.7958011627197 |
| K10644 | 7.0717601776123  |
| K10645 | 55.7316989898682 |
| K10646 | 32.8714981079102 |
| K10661 | 133.159400939941 |
| K10666 | 121.602871417999 |
| K10669 | 20.0683002471924 |
| K10676 | 16.9553093910217 |
| K10684 | 143.099597930908 |
| K10685 | 57.6068019866943 |
| K10688 | 112.717002868652 |
| K10689 | 195.363006591797 |
| K10690 | 1604.82995605469 |
| K10691 | 32.6826305389404 |
| K10695 | 50.959300994873  |
| K10696 | 138.038799285889 |
| K10703 | 59.9057912826538 |
| K10704 | 10.777099609375  |
| K10705 | 235.175003051758 |
| K10707 | 44.109001159668  |
| K10712 | 145.412163257599 |
| K10717 | 489.72247505188  |
| K10727 | 3.85122013092041 |

---

---

|        |                  |
|--------|------------------|
| K10728 | 25.3549499511719 |
| K10730 | 3.60838007926941 |
| K10732 | 24.6830999851227 |
| K10733 | 12.9245004653931 |
| K10734 | 1.22456002235413 |
| K10735 | 27.3265991210938 |
| K10736 | 7.60259008407593 |
| K10737 | 8.41361802816391 |
| K10738 | 21.7765898406506 |
| K10743 | 9.53592014312744 |
| K10744 | 2.79305005073547 |
| K10745 | 15.7720003128052 |
| K10746 | 13.5086841583252 |
| K10747 | 32.5256702899933 |
| K10750 | 22.4744501113892 |
| K10751 | 6.58273983001709 |
| K10752 | 187.615737915039 |
| K10753 | 30.9277992248535 |
| K10754 | 44.9196996688843 |
| K10755 | 65.826000213623  |
| K10756 | 13.9022603034973 |
| K10757 | 3.7225399017334  |
| K10758 | 32.6567001342773 |
| K10760 | 15.4462104439735 |
| K10761 | 57.7386102676392 |
| K10765 | 11.0777997970581 |
| K10768 | 5.13495016098022 |
| K10770 | 20.5371599197388 |
| K10772 | 12.0172297954559 |
| K10773 | 19.389095723629  |
| K10775 | 32.1533391475677 |
| K10777 | 4.76793992519379 |
| K10779 | 20.4963307380676 |
| K10781 | 1783.17680692673 |
| K10782 | 312.483612060547 |
| K10798 | 253.270161449909 |
| K10799 | 71.7916111946106 |
| K10802 | 6097.36545944214 |
| K10803 | 34.4698778986931 |
| K10807 | 4.86487007141113 |
| K10808 | 48.6777000427246 |
| K10827 | 122.04270863533  |
| K10834 | 49.1776008605957 |
| K10836 | 127.88484287262  |
| K10838 | 6.33099985122681 |
| K10839 | 1155.00681686401 |
| K10840 | 243.763000488281 |
| K10841 | 100.262378454208 |
| K10842 | 45.0895195007324 |
| K10843 | 176.706508755684 |

---

---

|        |                  |
|--------|------------------|
| K10844 | 10.5601997375488 |
| K10846 | 16.5872104167938 |
| K10848 | 32.0454205274582 |
| K10849 | 8.18175983428955 |
| K10858 | 6.42071008682251 |
| K10860 | 20.5532402992249 |
| K10862 | 365.512588500977 |
| K10863 | 56.8850002288818 |
| K10866 | 48.4495493173599 |
| K10867 | 6.74936008453369 |
| K10870 | 4.50557994842529 |
| K10871 | 21.1879795789719 |
| K10872 | 4.16118001937866 |
| K10875 | 30.1495304107666 |
| K10877 | 8.05508041381836 |
| K10878 | 44.8585386872292 |
| K10879 | 1.44646900892258 |
| K10884 | 9.60508024692535 |
| K10885 | 4.48644018173218 |
| K10886 | 17.6389000415802 |
| K10891 | 8.3547140955925  |
| K10895 | 3.25669598579407 |
| K10896 | 5.39869502186775 |
| K10899 | 11.4169998168945 |
| K10900 | 5.15313005447388 |
| K10901 | 13.6546002626419 |
| K10902 | 5.85122013092041 |
| K10903 | 25.7737193107605 |
| K10907 | 10.4503002166748 |
| K10908 | 6.47763013839722 |
| K10949 | 528.963025093079 |
| K10950 | 26.9691009521484 |
| K10956 | 292.092405319214 |
| K10960 | 108.317901611328 |
| K10976 | 26.9691009521484 |
| K10994 | 148.026459813118 |
| K10999 | 2042.40552759171 |
| K11000 | 309.600217819214 |
| K11085 | 4.11003005504608 |
| K11086 | 18.3346004486084 |
| K11088 | 54.9875984191895 |
| K11090 | 210.165901184082 |
| K11092 | 127.964996337891 |
| K11093 | 136.114001274109 |
| K11094 | 506.89720916748  |
| K11095 | 59.6800994873047 |
| K11098 | 258.964996337891 |
| K11099 | 192.720993041992 |
| K11108 | 86.030403137207  |
| K11111 | 3.25184011459351 |

---

---

|        |                   |
|--------|-------------------|
| K11126 | 4.98074996471405  |
| K11128 | 11.6140003204346  |
| K11129 | 123.171449184418  |
| K11135 | 101.568405151367  |
| K11136 | 3.13052999973297  |
| K11137 | 17.8880004882812  |
| K11145 | 38.5032005310059  |
| K11147 | 131.675003051758  |
| K11152 | 506.102567195892  |
| K11153 | 271.394798278809  |
| K11155 | 12.7018003463745  |
| K11157 | 59.7714996337891  |
| K11159 | 1139.28601074219  |
| K11161 | 0.787840008735657 |
| K11165 | 82.1877093315125  |
| K11168 | 44.5591011047363  |
| K11169 | 4.4198899269104   |
| K11186 | 0.66994297504425  |
| K11187 | 229.585998535156  |
| K11188 | 17.8736991882324  |
| K11228 | 319.650309443474  |
| K11229 | 31.0829405784607  |
| K11230 | 9.89966011047363  |
| K11238 | 231.320999145508  |
| K11247 | 114.061100006104  |
| K11251 | 829.986074447632  |
| K11252 | 558.463996887207  |
| K11253 | 12.6515998840332  |
| K11254 | 499.24388885498   |
| K11262 | 111.657302856445  |
| K11266 | 30.554500579834   |
| K11267 | 182.484860658646  |
| K11268 | 4.53337001800537  |
| K11271 | 0.660016000270844 |
| K11273 | 8.14848017692566  |
| K11274 | 1.89358896017075  |
| K11276 | 5.82986998558044  |
| K11279 | 387.394385814667  |
| K11290 | 49.5912017822266  |
| K11291 | 1.86951798200607  |
| K11292 | 204.453098297119  |
| K11293 | 45.8877296447754  |
| K11294 | 846.808517813683  |
| K11303 | 78.1445999145508  |
| K11308 | 54.1357002258301  |
| K11314 | 57.8264999389648  |
| K11320 | 8.54916000366211  |
| K11322 | 17.9842703342438  |
| K11324 | 54.3366012573242  |
| K11338 | 6.93805980682373  |

---

---

|        |                   |
|--------|-------------------|
| K11339 | 33.0850475430489  |
| K11341 | 69.827600479126   |
| K11344 | 39.2742004394531  |
| K11346 | 85.7476005554199  |
| K11353 | 562.575012207031  |
| K11362 | 36.6260986328125  |
| K11363 | 191.005104064941  |
| K11364 | 367.189598083496  |
| K11366 | 67.9913084506989  |
| K11367 | 154.462400436401  |
| K11368 | 50.5713005065918  |
| K11373 | 5.85221004486084  |
| K11374 | 38.9174995422363  |
| K11375 | 3.06030011177063  |
| K11378 | 11.4073300361633  |
| K11380 | 13.7842998504639  |
| K11393 | 27.358699798584   |
| K11404 | 42.9143981933594  |
| K11407 | 133.67777711153   |
| K11414 | 8.66205990314484  |
| K11416 | 32.1115198135376  |
| K11418 | 20.2369797229767  |
| K11419 | 37.2634010314941  |
| K11420 | 92.7137799263     |
| K11422 | 19.3731298446655  |
| K11423 | 53.6687002182007  |
| K11424 | 63.0666999816895  |
| K11426 | 59.7976698875427  |
| K11430 | 38.4284901618958  |
| K11433 | 10.504599571228   |
| K11434 | 160.719497680664  |
| K11436 | 11.4364004135132  |
| K11437 | 33.7393989562988  |
| K11438 | 7.71631002426147  |
| K11439 | 118.499496459961  |
| K11446 | 232.221745491028  |
| K11449 | 99.330152451992   |
| K11450 | 54.2810598611832  |
| K11456 | 0.456779986619949 |
| K11462 | 28.0356006622314  |
| K11490 | 20.3750991821289  |
| K11491 | 5.28923898935318  |
| K11494 | 521.509907007217  |
| K11498 | 63.9822406768799  |
| K11507 | 50.2700996398926  |
| K11517 | 65.2019009590149  |
| K11518 | 30.9060001373291  |
| K11527 | 1.80561995506287  |
| K11547 | 4.16202020645142  |
| K11548 | 30.2377996444702  |

---

---

|        |                  |
|--------|------------------|
| K11557 | 215.074996948242 |
| K11578 | 48.5541000366211 |
| K11583 | 55.9790000915527 |
| K11584 | 274.086273193359 |
| K11592 | 80.7153776884079 |
| K11593 | 745.466901898384 |
| K11594 | 103.724296569824 |
| K11596 | 864.882971167564 |
| K11599 | 277.031005859375 |
| K11600 | 38.339298248291  |
| K11642 | 4.34315013885498 |
| K11643 | 42.0739691257477 |
| K11644 | 359.088998794556 |
| K11646 | 9.59492015838623 |
| K11647 | 52.6877603530884 |
| K11649 | 161.715970516205 |
| K11650 | 29.7914009094238 |
| K11652 | 21.7266006469727 |
| K11654 | 52.8216886520386 |
| K11655 | 4.90632009506226 |
| K11657 | 9.67483043670654 |
| K11659 | 39.9954986572266 |
| K11662 | 8.29638957977295 |
| K11663 | 246.702239751816 |
| K11664 | 16.8598003387451 |
| K11665 | 290.567759037018 |
| K11666 | 70.6772003173828 |
| K11667 | 21.6037998199463 |
| K11671 | 15.0241301059723 |
| K11672 | 14.6169004440308 |
| K11673 | 12.9465999603271 |
| K11684 | 50.8425512313843 |
| K11699 | 31.7520883083344 |
| K11713 | 43.4123001098633 |
| K11714 | 116.053802490234 |
| K11717 | 117.545001983643 |
| K11718 | 42.6147994995117 |
| K11721 | 14.9450998306274 |
| K11723 | 60.9080991744995 |
| K11745 | 67.6349391937256 |
| K11747 | 67.6349391937256 |
| K11752 | 66.9414005279541 |
| K11755 | 90.5213012695312 |
| K11757 | 19.5228996276855 |
| K11770 | 35.9659996032715 |
| K11778 | 96.8178291320801 |
| K11786 | 10.0170001983643 |
| K11789 | 19.7660007476807 |
| K11793 | 54.8333015441895 |
| K11798 | 9.91829013824463 |

---



---

|        |                   |
|--------|-------------------|
| K11799 | 20.7798004150391  |
| K11801 | 569.603187561035  |
| K11804 | 1036.12010288239  |
| K11805 | 17.7444000244141  |
| K11806 | 116.374996185303  |
| K11808 | 12.4597997665405  |
| K11816 | 7.47018003463745  |
| K11817 | 197.619628787041  |
| K11819 | 166.582992553711  |
| K11820 | 7.74402022361755  |
| K11821 | 12.2242795825005  |
| K11824 | 50.3559989929199  |
| K11827 | 325.532005310059  |
| K11835 | 63.8904113769531  |
| K11836 | 69.3021984100342  |
| K11838 | 541.385652542114  |
| K11839 | 13.1330995559692  |
| K11840 | 0.723610997200012 |
| K11841 | 88.1218976974487  |
| K11842 | 94.3295993804932  |
| K11843 | 131.247798919678  |
| K11844 | 4.8723201751709   |
| K11851 | 5.14551019668579  |
| K11855 | 93.811888217926   |
| K11858 | 52.0331983566284  |
| K11863 | 28.0583000183105  |
| K11864 | 50.2773017883301  |
| K11866 | 721.954854726791  |
| K11868 | 564.690113544464  |
| K11876 | 38.4280014038086  |
| K11877 | 32.5957000255585  |
| K11883 | 101.137699127197  |
| K11884 | 79.0543975830078  |
| K11885 | 88.5619964599609  |
| K11886 | 55.4392595291138  |
| K11927 | 46.5917301177979  |
| K11968 | 299.805997371674  |
| K11971 | 81.1952991485596  |
| K11972 | 17.7012004852295  |
| K11975 | 8.89369010925293  |
| K11979 | 42.8068008422852  |
| K11982 | 824.91420674324   |
| K11984 | 31.5709991455078  |
| K11996 | 46.8263993263245  |
| K12115 | 168.385499000549  |
| K12116 | 168.385499000549  |
| K12117 | 168.385499000549  |
| K12118 | 244.081001281738  |
| K12119 | 244.081001281738  |
| K12120 | 159.51487827301   |

---

---

|        |                  |
|--------|------------------|
| K12121 | 159.51487827301  |
| K12122 | 159.51487827301  |
| K12123 | 159.51487827301  |
| K12124 | 197.944801330566 |
| K12125 | 198.022994995117 |
| K12126 | 1.31269001960754 |
| K12127 | 41.2566998004913 |
| K12128 | 10.1336002349854 |
| K12129 | 135.875299453735 |
| K12130 | 26.7765793800354 |
| K12132 | 297.489796638489 |
| K12135 | 256.053517103195 |
| K12162 | 640.059020996094 |
| K12163 | 754.15279006958  |
| K12164 | 80.834098815918  |
| K12169 | 28.2616996765137 |
| K12173 | 36.8286018371582 |
| K12175 | 141.391101837158 |
| K12176 | 156.293322205544 |
| K12177 | 105.436996459961 |
| K12178 | 25.229700088501  |
| K12179 | 73.2984008789062 |
| K12180 | 84.9792022705078 |
| K12181 | 67.0147018432617 |
| K12183 | 26.3038997650146 |
| K12184 | 38.7419013977051 |
| K12185 | 126.488304138184 |
| K12188 | 37.3941993713379 |
| K12189 | 85.9160995483398 |
| K12190 | 26.3122005462646 |
| K12191 | 289.476989746094 |
| K12192 | 154.087005615234 |
| K12194 | 387.590087518096 |
| K12195 | 175.149993896484 |
| K12196 | 352.149192810059 |
| K12197 | 435.352996826172 |
| K12198 | 282.130996704102 |
| K12199 | 48.9954986572266 |
| K12200 | 60.6395988464355 |
| K12231 | 30.8963003158569 |
| K12232 | 3.97305989265442 |
| K12235 | 18.1439003944397 |
| K12236 | 22.7242002487183 |
| K12251 | 85.1764984130859 |
| K12256 | 129.938697814941 |
| K12259 | 6.70276021957397 |
| K12261 | 178.863998413086 |
| K12271 | 9.69076979160309 |
| K12272 | 50.2634010314941 |
| K12275 | 105.005996704102 |

---

---

|        |                   |
|--------|-------------------|
| K12309 | 1986.32302461565  |
| K12311 | 132.939319610596  |
| K12343 | 165.664503097534  |
| K12345 | 3.07941007614136  |
| K12347 | 127.88500213623   |
| K12349 | 56.2650985717773  |
| K12355 | 324.260987281799  |
| K12356 | 0.768660008907318 |
| K12373 | 1170.78920078278  |
| K12375 | 2.32260990142822  |
| K12382 | 1497.33965110779  |
| K12385 | 81.8605003356934  |
| K12386 | 342.734008789062  |
| K12391 | 35.1057014465332  |
| K12392 | 390.205501556396  |
| K12393 | 96.109001159668   |
| K12396 | 11.6365599632263  |
| K12397 | 37.1494607925415  |
| K12398 | 79.774299621582   |
| K12399 | 21.5585298538208  |
| K12400 | 40.2422981262207  |
| K12401 | 37.4476013183594  |
| K12402 | 125.869003295898  |
| K12403 | 201.337997436523  |
| K12405 | 390.466003417969  |
| K12418 | 17.2206001281738  |
| K12446 | 38.5738010406494  |
| K12447 | 57.0704002380371  |
| K12448 | 25.2378997802734  |
| K12449 | 416.285003662109  |
| K12450 | 242.974395751953  |
| K12451 | 129.861999511719  |
| K12460 | 67.4271297454834  |
| K12462 | 27.054519534111   |
| K12467 | 42.894100189209   |
| K12469 | 163.95369720459   |
| K12471 | 410.348912715912  |
| K12476 | 163.95369720459   |
| K12477 | 163.95369720459   |
| K12479 | 115.799200057983  |
| K12483 | 163.95369720459   |
| K12486 | 135.873001098633  |
| K12489 | 165.599899291992  |
| K12492 | 305.470708847046  |
| K12493 | 643.159472584724  |
| K12501 | 52.7504801750183  |
| K12502 | 83.5844788551331  |
| K12524 | 6539.12200164795  |
| K12580 | 64.2298984527588  |
| K12581 | 253.155996322632  |

---

---

|        |                  |
|--------|------------------|
| K12585 | 42.2875995635986 |
| K12586 | 6.69590997695923 |
| K12587 | 81.9711990356445 |
| K12591 | 86.0956506729126 |
| K12593 | 39.1316986083984 |
| K12598 | 119.743499755859 |
| K12599 | 16.2288899421692 |
| K12600 | 63.3849582672119 |
| K12602 | 41.1440010070801 |
| K12603 | 144.12563085556  |
| K12604 | 19.8568992614746 |
| K12605 | 69.8936309814453 |
| K12606 | 75.6773996353149 |
| K12607 | 28.9878101348877 |
| K12608 | 72.1559991836548 |
| K12611 | 59.6483306884766 |
| K12613 | 47.7350997924805 |
| K12614 | 157.467002868652 |
| K12616 | 25.9762992858887 |
| K12617 | 101.079200744629 |
| K12619 | 225.389962464571 |
| K12620 | 139.880996704102 |
| K12621 | 277.910701751709 |
| K12623 | 148.225997924805 |
| K12624 | 60.7932014465332 |
| K12627 | 72.0030975341797 |
| K12640 | 5.24597012996674 |
| K12655 | 59.5873985290527 |
| K12657 | 43.3804016113281 |
| K12662 | 80.8429985046387 |
| K12663 | 37.1293983459473 |
| K12666 | 135.410598754883 |
| K12667 | 105.930999755859 |
| K12668 | 301.816986083984 |
| K12669 | 31.1517798900604 |
| K12670 | 202.97900390625  |
| K12733 | 38.2697982788086 |
| K12734 | 34.9990005493164 |
| K12735 | 11.1735301017761 |
| K12736 | 19.0419998168945 |
| K12737 | 17.755199432373  |
| K12741 | 356.292136669159 |
| K12742 | 430.763895273209 |
| K12795 | 140.542007446289 |
| K12811 | 22.9743399620056 |
| K12812 | 349.325096130371 |
| K12813 | 26.5991291999817 |
| K12815 | 26.407600402832  |
| K12816 | 65.0679111480713 |
| K12817 | 33.4813995361328 |

---

---

|        |                  |
|--------|------------------|
| K12818 | 91.8642597198486 |
| K12819 | 272.412002563477 |
| K12820 | 249.796183586121 |
| K12821 | 134.110919952393 |
| K12822 | 119.853202819824 |
| K12823 | 414.688196182251 |
| K12824 | 16.5919990539551 |
| K12825 | 64.8738794326782 |
| K12826 | 78.7101974487305 |
| K12827 | 286.975003242493 |
| K12828 | 36.1497001647949 |
| K12829 | 170.882099151611 |
| K12830 | 15.6691999435425 |
| K12831 | 157.144100189209 |
| K12834 | 125.166000366211 |
| K12835 | 61.5649013519287 |
| K12836 | 84.9875030517578 |
| K12837 | 160.889032363892 |
| K12839 | 189.279899597168 |
| K12840 | 65.5711975097656 |
| K12842 | 91.8022003173828 |
| K12843 | 114.614570975304 |
| K12844 | 102.842098236084 |
| K12845 | 208.432998657227 |
| K12847 | 73.4997978210449 |
| K12848 | 135.943496704102 |
| K12850 | 47.7974014282227 |
| K12852 | 72.5176992416382 |
| K12854 | 81.9771106243134 |
| K12855 | 41.8570199012756 |
| K12856 | 121.24179649353  |
| K12857 | 80.5945014953613 |
| K12858 | 25.1949996948242 |
| K12859 | 677.162874221802 |
| K12860 | 81.7496013641357 |
| K12861 | 49.244499206543  |
| K12862 | 45.7088012695312 |
| K12863 | 203.333999633789 |
| K12864 | 76.9909710884094 |
| K12865 | 26.6361999511719 |
| K12867 | 8.3530797958374  |
| K12868 | 148.720993041992 |
| K12869 | 16.4440994262695 |
| K12871 | 43.723201751709  |
| K12872 | 54.0424003601074 |
| K12874 | 8.38376045227051 |
| K12875 | 76.5832977294922 |
| K12876 | 126.704002380371 |
| K12877 | 115.46900177002  |
| K12878 | 101.940900802612 |

---

---

|        |                   |
|--------|-------------------|
| K12879 | 36.3910999298096  |
| K12880 | 83.7764015197754  |
| K12881 | 663.230907440186  |
| K12882 | 27.2564001083374  |
| K12883 | 77.2733993530273  |
| K12884 | 0.870055973529816 |
| K12886 | 0.891902983188629 |
| K12888 | 0.586812019348145 |
| K12890 | 64.8002500534058  |
| K12891 | 124.930999755859  |
| K12893 | 0.335251003503799 |
| K12897 | 114.395980358124  |
| K12898 | 485.301706433296  |
| K12929 | 16.1016998291016  |
| K12930 | 3.7225399017334   |
| K12946 | 34.6137008666992  |
| K12947 | 262.280502319336  |
| K12948 | 338.731994628906  |
| K12960 | 63.268798828125   |
| K12968 | 4.73669004440308  |
| K13024 | 5.5227198600769   |
| K13025 | 1181.93948459625  |
| K13030 | 121.372918486595  |
| K13034 | 736.505344927311  |
| K13035 | 37.5693998336792  |
| K13044 | 127.280002593994  |
| K13051 | 54.7860994338989  |
| K13064 | 32.1533391475677  |
| K13065 | 484.268392324448  |
| K13066 | 183.329803466797  |
| K13067 | 10.7613000869751  |
| K13068 | 6.54441022872925  |
| K13070 | 194.632995605469  |
| K13071 | 133.281744241714  |
| K13076 | 177.804629921913  |
| K13082 | 194.233359098434  |
| K13091 | 191.49978017807   |
| K13093 | 61.2864499092102  |
| K13094 | 181.679319381714  |
| K13095 | 89.3013401031494  |
| K13096 | 271.093994140625  |
| K13098 | 0.632463991641998 |
| K13099 | 59.4505882263184  |
| K13100 | 64.9902300834656  |
| K13101 | 49.2925987243652  |
| K13102 | 11.8535003662109  |
| K13103 | 34.7255010604858  |
| K13104 | 28.8006000518799  |
| K13105 | 15.8936004638672  |
| K13106 | 33.8278007507324  |

---

---

|        |                   |
|--------|-------------------|
| K13107 | 26.7301006317139  |
| K13108 | 50.9266014099121  |
| K13109 | 40.8540000915527  |
| K13110 | 162.589099884033  |
| K13111 | 36.4497985839844  |
| K13114 | 26.5648994445801  |
| K13115 | 260.349006652832  |
| K13116 | 70.2031021118164  |
| K13117 | 11.5455102920532  |
| K13118 | 22.9461994171143  |
| K13119 | 49.2509002685547  |
| K13121 | 80.8059997558594  |
| K13123 | 5.09294986724854  |
| K13124 | 13.4069004058838  |
| K13126 | 604.621078073978  |
| K13127 | 84.2877006530762  |
| K13128 | 50.1758995056152  |
| K13130 | 19.9841003417969  |
| K13136 | 390.633012771606  |
| K13137 | 276.586006164551  |
| K13140 | 5.97939318418503  |
| K13144 | 29.1938220709562  |
| K13146 | 10.0728998184204  |
| K13148 | 470.264361351728  |
| K13150 | 23.8689000606537  |
| K13151 | 104.368999481201  |
| K13153 | 41.7772212028503  |
| K13154 | 8.00152015686035  |
| K13155 | 20.6051998138428  |
| K13156 | 7.50321000814438  |
| K13157 | 28.8145308494568  |
| K13158 | 3.02259504795074  |
| K13159 | 0.767696976661682 |
| K13160 | 136.141500473022  |
| K13161 | 327.605504989624  |
| K13162 | 883.745904445648  |
| K13168 | 166.262298583984  |
| K13173 | 12.9764995574951  |
| K13174 | 87.2024993896484  |
| K13175 | 33.4928016662598  |
| K13176 | 51.7481994628906  |
| K13179 | 119.088171958923  |
| K13181 | 19.1201992034912  |
| K13182 | 349.325096130371  |
| K13183 | 191.078002929688  |
| K13187 | 28.6930999755859  |
| K13190 | 4.954430103302    |
| K13192 | 59.5966787338257  |
| K13194 | 14.9723303318024  |
| K13195 | 209.105894088745  |

---

---

|        |                  |
|--------|------------------|
| K13199 | 697.787506699562 |
| K13201 | 1682.9147105217  |
| K13206 | 43.6786003112793 |
| K13207 | 118.974901199341 |
| K13210 | 417.985207557678 |
| K13211 | 38.3795199394226 |
| K13212 | 75.8194198608398 |
| K13213 | 2.33916103839874 |
| K13216 | 46.4752583503723 |
| K13217 | 287.978110551834 |
| K13220 | 117.033996582031 |
| K13223 | 43.85471534729   |
| K13225 | 43.85471534729   |
| K13229 | 148.480501174927 |
| K13230 | 3932.14314937592 |
| K13232 | 67.0098037719727 |
| K13237 | 190.365997314453 |
| K13248 | 32.7911987304688 |
| K13249 | 71.1529006958008 |
| K13250 | 116.832000732422 |
| K13254 | 47.5475006103516 |
| K13278 | 11.7938003540039 |
| K13279 | 0.66994297504425 |
| K13280 | 209.20280456543  |
| K13288 | 38.5168991088867 |
| K13289 | 882.455107688904 |
| K13335 | 30.0836498737335 |
| K13336 | 53.2044982910156 |
| K13337 | 72.6035995483398 |
| K13338 | 26.0992197990417 |
| K13339 | 77.3843661546707 |
| K13341 | 19.9708003997803 |
| K13342 | 157.273204803467 |
| K13343 | 150.105380535126 |
| K13345 | 40.0871000289917 |
| K13346 | 14.1165500879288 |
| K13347 | 18.544900894165  |
| K13348 | 359.361799240112 |
| K13353 | 78.7853012084961 |
| K13354 | 555.573369503021 |
| K13356 | 1865.44498443604 |
| K13366 | 7.40527009963989 |
| K13367 | 839.17501449585  |
| K13379 | 98.2372970581055 |
| K13412 | 587.52729010582  |
| K13413 | 96.7597026824951 |
| K13414 | 180.56770324707  |
| K13415 | 659.410616159439 |
| K13416 | 1827.51141625643 |
| K13417 | 332.212726891041 |

---



---

|        |                  |
|--------|------------------|
| K13418 | 1827.51141625643 |
| K13420 | 1118.95483785868 |
| K13421 | 284.150002479553 |
| K13422 | 141.932768344879 |
| K13424 | 222.417538881302 |
| K13425 | 22.1366505622864 |
| K13427 | 25.9671001434326 |
| K13428 | 76.5511944890022 |
| K13429 | 224.704956293106 |
| K13430 | 1777.2592793107  |
| K13431 | 284.680999755859 |
| K13447 | 91.3569670319557 |
| K13448 | 1835.64999747276 |
| K13449 | 168.413592815399 |
| K13456 | 190.369860172272 |
| K13457 | 397.695120453835 |
| K13458 | 36.2622985839844 |
| K13459 | 387.032578468323 |
| K13462 | 157.588299751282 |
| K13463 | 92.2860012054443 |
| K13464 | 958.16620850563  |
| K13473 | 4.55663013458252 |
| K13484 | 54.1455001831055 |
| K13493 | 16.5604499578476 |
| K13495 | 47.0656250715256 |
| K13496 | 291.43242764473  |
| K13506 | 90.2499008178711 |
| K13508 | 112.88257932663  |
| K13510 | 107.538887023926 |
| K13511 | 78.1443977355957 |
| K13513 | 22.1951094865799 |
| K13519 | 126.304697990417 |
| K13523 | 106.747940063477 |
| K13525 | 956.536292791367 |
| K13528 | 41.988899230957  |
| K13535 | 114.973999023438 |
| K13544 | 94.8967094421387 |
| K13545 | 24.217399597168  |
| K13566 | 88.1380996704102 |
| K13577 | 6.38748979568481 |
| K13600 | 16.0720996856689 |
| K13606 | 594.219391822815 |
| K13621 | 134.192380070686 |
| K13628 | 630.680152773857 |
| K13648 | 604.153227567673 |
| K13667 | 30.6319804191589 |
| K13679 | 78.5214996337891 |
| K13680 | 247.318042516708 |
| K13681 | 72.099761724472  |
| K13691 | 7.74402022361755 |

---

---

|        |                  |
|--------|------------------|
| K13692 | 39.830470085144  |
| K13696 | 10.038800239563  |
| K13711 | 59.7308006286621 |
| K13717 | 67.2868406772614 |
| K13719 | 244.455993652344 |
| K13726 | 7.36632013320923 |
| K13728 | 17.2553005218506 |
| K13730 | 373.47203540802  |
| K13754 | 54.2423710823059 |
| K13783 | 56.1392711400986 |
| K13789 | 244.851296186447 |
| K13800 | 46.1828002929688 |
| K13811 | 147.876637458801 |
| K13832 | 34.323299407959  |
| K13863 | 141.407697677612 |
| K13864 | 141.407697677612 |
| K13865 | 141.407697677612 |
| K13917 | 177.442596435547 |
| K13946 | 203.481874465942 |
| K13947 | 49.006178855896  |
| K13950 | 14.1733399629593 |
| K13951 | 857.520641833544 |
| K13963 | 86.1330032348633 |
| K13979 | 2243.58216714859 |
| K13981 | 323.246002197266 |
| K13982 | 44.2182306051254 |
| K13983 | 5.30961990356445 |
| K13984 | 82.7816009521484 |
| K13989 | 327.222649335861 |
| K13993 | 468.719190120697 |
| K13998 | 93.9628064036369 |
| K14001 | 50.0989990234375 |
| K14002 | 52.562801361084  |
| K14003 | 110.10120010376  |
| K14004 | 252.242595672607 |
| K14005 | 40.9099006652832 |
| K14006 | 188.868549346924 |
| K14007 | 149.011003494263 |
| K14009 | 117.586011886597 |
| K14011 | 34.3126983642578 |
| K14012 | 227.030598640442 |
| K14015 | 46.5060997009277 |
| K14016 | 199.580169677734 |
| K14018 | 43.481530547142  |
| K14026 | 49.2695999145508 |
| K14050 | 142.822101593018 |
| K14066 | 76.1602020263672 |
| K14077 | 12.1843004226685 |
| K14079 | 21.9556894302368 |
| K14085 | 344.60400390625  |

---

---

|        |                  |
|--------|------------------|
| K14137 | 53.941890001297  |
| K14153 | 15.9813003540039 |
| K14156 | 63.1451988220215 |
| K14157 | 67.0251007080078 |
| K14164 | 6.56794023513794 |
| K14165 | 221.80549621582  |
| K14168 | 20.5228004455566 |
| K14169 | 10.745400428772  |
| K14172 | 96.4599990844727 |
| K14190 | 237.566492080688 |
| K14191 | 88.8238003253937 |
| K14207 | 261.730281591415 |
| K14209 | 22.7632691860199 |
| K14213 | 103.966003417969 |
| K14267 | 163.664402961731 |
| K14270 | 11.7655799388885 |
| K14288 | 6.92852020263672 |
| K14289 | 31.013920545578  |
| K14290 | 64.7269667983055 |
| K14292 | 28.83899974823   |
| K14293 | 44.6600208282471 |
| K14294 | 35.0172996520996 |
| K14295 | 18.6331996917725 |
| K14297 | 50.5621485710144 |
| K14298 | 31.0645399093628 |
| K14299 | 44.4747009277344 |
| K14300 | 10.7161998748779 |
| K14301 | 22.8290004730225 |
| K14303 | 23.6684601306915 |
| K14304 | 62.6593017578125 |
| K14305 | 31.4229898452759 |
| K14308 | 27.1742000579834 |
| K14309 | 36.5577993392944 |
| K14310 | 10.950400352478  |
| K14311 | 3.44406008720398 |
| K14312 | 19.2741594314575 |
| K14313 | 34.7840995788574 |
| K14314 | 26.620593726635  |
| K14315 | 28.2680997848511 |
| K14317 | 16.5442295074463 |
| K14318 | 21.4977498054504 |
| K14319 | 34.1128997802734 |
| K14320 | 9.3779296875     |
| K14321 | 10.6155996322632 |
| K14324 | 59.6750984191895 |
| K14325 | 58.8652992248535 |
| K14326 | 122.947710514069 |
| K14327 | 118.252955138683 |
| K14328 | 34.1562004089355 |
| K14347 | 118.852703094482 |

---

---

|        |                  |
|--------|------------------|
| K14360 | 38.160701751709  |
| K14376 | 167.218199491501 |
| K14396 | 171.114097595215 |
| K14397 | 83.9821615219116 |
| K14399 | 18.108571767807  |
| K14401 | 9.50502991676331 |
| K14402 | 116.973598480225 |
| K14403 | 46.1587982177734 |
| K14404 | 48.4459767341614 |
| K14405 | 6.62330007553101 |
| K14406 | 12.5728998184204 |
| K14407 | 49.0703010559082 |
| K14408 | 11.5999002456665 |
| K14409 | 73.6122970581055 |
| K14411 | 1041.22237253189 |
| K14412 | 12.5362997055054 |
| K14413 | 219.102467536926 |
| K14416 | 568.966163635254 |
| K14423 | 127.629997253418 |
| K14424 | 61.566798210144  |
| K14427 | 478.528694152832 |
| K14431 | 291.074239015579 |
| K14432 | 76.0225992202759 |
| K14439 | 85.1827993392944 |
| K14440 | 5.54228973388672 |
| K14442 | 232.048613548279 |
| K14445 | 138.714019298553 |
| K14452 | 124.707504272461 |
| K14453 | 132.0002784729   |
| K14455 | 105.698997497559 |
| K14457 | 448.167499542236 |
| K14484 | 2406.5021815896  |
| K14485 | 1117.70731163025 |
| K14486 | 1481.64452970028 |
| K14487 | 233.799659490585 |
| K14488 | 88.4017918109894 |
| K14489 | 169.317752480507 |
| K14490 | 132.210541248322 |
| K14491 | 256.373323738575 |
| K14492 | 257.903510630131 |
| K14493 | 430.578319072723 |
| K14494 | 844.500777065754 |
| K14495 | 54.5525016784668 |
| K14496 | 73.0670991539955 |
| K14497 | 1007.19859218597 |
| K14498 | 633.612936019897 |
| K14500 | 208.881110787392 |
| K14501 | 1.04407000541687 |
| K14502 | 605.863117218018 |
| K14503 | 130.134016990662 |

---

---

|        |                   |
|--------|-------------------|
| K14504 | 227.899208068848  |
| K14506 | 154.399898529053  |
| K14508 | 144.644500732422  |
| K14509 | 139.934101104736  |
| K14510 | 529.421504974365  |
| K14512 | 253.400001525879  |
| K14513 | 135.506198883057  |
| K14514 | 783.966347694397  |
| K14515 | 213.954049825668  |
| K14516 | 0.991460025310516 |
| K14521 | 9.33782005310059  |
| K14525 | 61.99289894104    |
| K14535 | 133.143583297729  |
| K14536 | 7.64197015762329  |
| K14537 | 67.0361022949219  |
| K14538 | 83.7753982543945  |
| K14539 | 78.7326984405518  |
| K14540 | 37.5661010742188  |
| K14544 | 7.29538011550903  |
| K14545 | 114.524002075195  |
| K14546 | 100.474500656128  |
| K14548 | 205.502722263336  |
| K14550 | 29.8445737957954  |
| K14552 | 8.47628021240234  |
| K14553 | 19.9193992614746  |
| K14554 | 18.4666004180908  |
| K14555 | 16.1487703323364  |
| K14556 | 51.4778995513916  |
| K14557 | 23.9640007019043  |
| K14558 | 367.871800422668  |
| K14560 | 27.3292999267578  |
| K14561 | 51.0838012695312  |
| K14563 | 90.2993011474609  |
| K14564 | 100.319999694824  |
| K14565 | 33.1921005249023  |
| K14566 | 131.012939214706  |
| K14567 | 22.9745006561279  |
| K14568 | 26.2285003662109  |
| K14569 | 46.1806888580322  |
| K14570 | 107.535563468933  |
| K14571 | 89.7533016204834  |
| K14572 | 22.7392107248306  |
| K14573 | 376.361463904381  |
| K14574 | 1871.9061768055   |
| K14575 | 13.7758896350861  |
| K14606 | 35.2371997833252  |
| K14609 | 21.5466003417969  |
| K14610 | 20.9572501182556  |
| K14611 | 628.555661916733  |
| K14617 | 192.494400024414  |

---

---

|        |                   |
|--------|-------------------|
| K14638 | 1041.07945477962  |
| K14640 | 0.99974399805069  |
| K14641 | 196.13920211792   |
| K14648 | 242.910003662109  |
| K14649 | 19.1441402435303  |
| K14652 | 153.327272415161  |
| K14662 | 12.1010999679565  |
| K14664 | 386.96390247345   |
| K14674 | 188.400700569153  |
| K14677 | 78.8534984588623  |
| K14682 | 27.1473999023438  |
| K14685 | 17.3348007202148  |
| K14686 | 158.645567893982  |
| K14689 | 86.8258717656136  |
| K14694 | 59.0772018432617  |
| K14696 | 37.2247009277344  |
| K14704 | 22.8729109764099  |
| K14708 | 8.62538003921509  |
| K14709 | 12.746570110321   |
| K14713 | 155.511302947998  |
| K14721 | 40.9819997549057  |
| K14724 | 379.040421724319  |
| K14726 | 44.8623008728027  |
| K14729 | 2.57593989372253  |
| K14753 | 80.6384011507034  |
| K14758 | 801.144916534424  |
| K14759 | 0.919018000364304 |
| K14765 | 38.4650993347168  |
| K14766 | 14.9979000091553  |
| K14767 | 64.6688995361328  |
| K14768 | 22.3423004150391  |
| K14769 | 81.1410980224609  |
| K14771 | 10.5269002914429  |
| K14772 | 11.8219002485275  |
| K14774 | 120.249200820923  |
| K14775 | 101.899569034576  |
| K14776 | 135.607597351074  |
| K14777 | 137.508403778076  |
| K14778 | 20.0466995239258  |
| K14779 | 3.94323992729187  |
| K14780 | 21.2199101448059  |
| K14782 | 41.8283996582031  |
| K14784 | 106.884002685547  |
| K14786 | 10.600700378418   |
| K14787 | 15.5804004669189  |
| K14788 | 14.5959997177124  |
| K14790 | 48.8336200714111  |
| K14791 | 114.619501113892  |
| K14792 | 21.0572501420975  |
| K14793 | 14.0789003372192  |

---

---

|        |                  |
|--------|------------------|
| K14794 | 52.3620798587799 |
| K14795 | 81.9654006958008 |
| K14797 | 51.8620986938477 |
| K14798 | 19.0104007720947 |
| K14799 | 104.097818851471 |
| K14800 | 90.5419006347656 |
| K14801 | 50.4083003997803 |
| K14802 | 70.5910696387291 |
| K14803 | 276.954986572266 |
| K14805 | 22.8691005706787 |
| K14806 | 30.3383007049561 |
| K14807 | 24.1503000259399 |
| K14808 | 24.8420405387878 |
| K14809 | 859.722249031067 |
| K14810 | 76.1594009399414 |
| K14811 | 43.3644981384277 |
| K14815 | 115.966003417969 |
| K14816 | 82.3928985595703 |
| K14818 | 21.3470993041992 |
| K14819 | 247.513103485107 |
| K14820 | 87.2732009887695 |
| K14821 | 32.3913295269012 |
| K14822 | 91.8033981323242 |
| K14823 | 46.679500579834  |
| K14824 | 43.2444000244141 |
| K14825 | 144.184001922607 |
| K14826 | 24.3404898643494 |
| K14827 | 10.773099899292  |
| K14829 | 209.155570626259 |
| K14830 | 3.15430998802185 |
| K14831 | 31.5946006774902 |
| K14832 | 42.571400642395  |
| K14833 | 22.2823506593704 |
| K14834 | 19.1982097625732 |
| K14835 | 158.469923019409 |
| K14837 | 213.660483956337 |
| K14838 | 122.606026232243 |
| K14839 | 32.4874000549316 |
| K14840 | 71.0268020629883 |
| K14841 | 17.3492501974106 |
| K14842 | 80.3932037353516 |
| K14843 | 251.157402038574 |
| K14844 | 116.099996566772 |
| K14845 | 27.8283996582031 |
| K14846 | 102.769298553467 |
| K14847 | 26.4123001098633 |
| K14848 | 51.9692993164062 |
| K14849 | 117.818300247192 |
| K14850 | 42.351001739502  |
| K14851 | 67.0308990478516 |

---

---

|        |                  |
|--------|------------------|
| K14852 | 71.3385009765625 |
| K14855 | 44.5131015777588 |
| K14856 | 34.7295999526978 |
| K14857 | 23.4074001312256 |
| K14859 | 15.1049003601074 |
| K14861 | 620.295547485352 |
| K14863 | 108.5482006073   |
| K14864 | 46.1864013671875 |
| K14944 | 334.265991210938 |
| K14945 | 446.272703170776 |
| K14948 | 534.641498565674 |
| K14950 | 113.739402770996 |
| K14961 | 11.9743995666504 |
| K14962 | 43.6746888160706 |
| K14963 | 177.084595680237 |
| K14964 | 24.1823997497559 |
| K14966 | 261.568881988525 |
| K14972 | 5.26541996002197 |
| K14977 | 35.6286890506744 |
| K15014 | 188.059497833252 |
| K15015 | 324.864417433739 |
| K15026 | 68.9071006774902 |
| K15027 | 50.2273006439209 |
| K15028 | 243.570999145508 |
| K15029 | 29.171199798584  |
| K15030 | 65.8124008178711 |
| K15031 | 7.79570007324219 |
| K15032 | 149.887030363083 |
| K15033 | 29.9032001495361 |
| K15040 | 644.908201217651 |
| K15043 | 441.860733747482 |
| K15044 | 26.0979995727539 |
| K15046 | 89.8577907085419 |
| K15047 | 38.1208992004395 |
| K15053 | 27.8572998046875 |
| K15071 | 83.2972984313965 |
| K15074 | 22.2395992279053 |
| K15075 | 3.32413005828857 |
| K15078 | 642.951090633869 |
| K15082 | 30.3311996459961 |
| K15083 | 107.983720779419 |

---
